1 **Microbial community structure and microbial networks correspond**  
2 **to nutrient gradients within coastal wetlands of the Great Lakes.**

3  
4 **Dean J. Horton<sup>1</sup>, Kevin R. Theis<sup>2</sup>, Donald G. Uzarski<sup>1</sup>, and Deric R. Learman<sup>1\*</sup>**

5  
6 <sup>1</sup>Institute for Great Lakes Research, CMU Biological Station, and Department of Biology, Central  
7 Michigan University, Mt. Pleasant, MI, U.S.A.

8 <sup>2</sup>Department of Microbiology, Immunology, and Biochemistry, Wayne State University, Detroit,  
9 MI, U.S.A

10

11 **\*Correspondence:**

12 Deric R. Learman

13 deric.learman@cmich.edu

14

15 **Keywords: microbial, community structure, network analysis, Great Lakes, wetlands,**  
16 **nutrients, anthropogenic, Lake Erie**

17

18 Word count: 7,202

19 Figure count: 7

In review

20 **Abstract**

21

22 Microbial communities within the soil of Great Lakes coastal wetlands drive  
23 biogeochemical cycles and provide several other ecosystems services. However, there exists a lack  
24 of understanding of how microbial communities respond to nutrient gradients and human activity  
25 in these systems. This research sought to address the lack of understanding through exploration of  
26 relationships between nutrient gradients, microbial community diversity, and microbial networks  
27 among coastal wetlands throughout the Great Lakes. Significant differences in microbial  
28 community structure were found among coastal wetlands within the western basin of Lake Erie  
29 and all other wetlands studied (three regions within Saginaw Bay and one region in the Beaver  
30 Archipelago). Further, within Lake Erie wetlands, chemical and biological structure did not vary  
31 with increasing soil depth. Beyond this, alpha diversity levels were highest within Lake Erie  
32 coastal wetlands. These diversity differences coincided with higher nutrient levels within the Lake  
33 Erie region. Site-to-site variability also existed within the majority of the regions studied,  
34 suggesting site-scale heterogeneity may impact microbial community structure. Several  
35 subnetworks of microbial communities and individual community members were related to  
36 chemical gradients among wetland regions, revealing several candidate indicator communities and  
37 taxa which may be useful for Great Lakes coastal wetland management. This research provides an  
38 initial characterization of microbial communities among Great Lakes coastal wetlands and  
39 demonstrates that microbial communities could be negatively impacted by anthropogenic  
40 activities. Anthropogenic impacts to these coastal wetland communities could influence natural  
41 biogeochemical cycles which occur within coastal wetland soils, and by extension would directly  
42 influence the Great Lakes themselves.

43

44 **1. Introduction**

45

46 The Laurentian Great Lakes of North America are one of the largest freshwater systems on  
47 Earth, and are critical in supporting biogeochemical cycles, freshwater resources, biodiversity, and  
48 economic viability of the surrounding region. Notably, the Great Lakes region has been impacted  
49 by anthropogenic pressure, with cumulative stress having a particular impact on the western basin  
50 of Lake Erie (Danz *et al.*, 2007; Uzarski *et al.*, 2017). These negative impacts extend to ecological  
51 transition zones between upland and aquatic environments in the form of coastal wetlands which  
52 border the Great Lakes (Uzarski, 2009), as agricultural runoff, atmospheric deposition, and  
53 urbanization influence water chemistry, thereby reducing water quality and impairing wetlands  
54 (Treibitz *et al.*, 2007; Morrice *et al.*, 2008). This has stoked a surge in research assessing  
55 biodiversity and anthropogenic pressure on coastal wetlands of the Great Lakes since the Great  
56 Lakes Water Quality Agreement (GLWQA) was established in 1972 (Hackett *et al.*, 2017). While  
57 much research on coastal wetlands has flourished in the wake of this international agreement,  
58 microbial communities within Great Lakes coastal wetlands remain almost entirely  
59 uncharacterized (Hackett *et al.*, 2017). The few research studies on microbial communities in Great  
60 Lakes coastal wetlands have focused on the use of microbial enzymatic assays as a tool to explore  
61 decomposition rates and nutrient limitation (Jackson *et al.*, 1995; Hill *et al.*, 2006). Community  
62 diversity, structure, and taxonomic composition have been largely overlooked. As the microbial  
63 communities within Great Lakes coastal wetlands have yet to be fundamentally described, it is  
64 important to gather baseline data on what microbes exist within these systems, to elucidate how

65 these microbes could be interacting, and to determine to what extent microbial diversity may  
66 already be impacted by anthropogenic chemical disturbance.

67

68 Microbial communities contribute substantially to the ecological functioning of coastal  
69 wetlands, and these wetlands are vital in the retention of chemical pollutants (e.g., heavy metals),  
70 sediments, and excess nutrients (e.g., N and P) caused by anthropogenic activity from impacting  
71 the Great Lakes themselves (Wang & Mitsch, 1998; Sierszen *et al.*, 2012). Coastal wetlands border  
72 much of the Great Lakes coastline, where they make up nearly 200,000 ha of habitat between the  
73 United States and Canada, despite reduction of habitat by approximately 50% since European  
74 colonization (Dahl, 1990; Hecnar, 2004; Sierszen *et al.*, 2012). Further, the economy of the Great  
75 Lakes is contingent on the existence and proper functioning of coastal wetlands. In providing  
76 ecosystem services and promoting biodiversity, these wetlands have an estimated annual worth of  
77 \$69 billion USD; the value of recreational fishing alone is valued at \$7.4 billion USD per year  
78 (Krantzberg & de Boer, 2008; Campbell *et al.*, 2015). As such, negative anthropogenic impacts on  
79 microbial communities could influence the economic viability of the Great Lakes region,  
80 biodiversity retention, and the functioning of critical elemental cycles which commonly occur  
81 within freshwater wetlands.

82

83 Most notably, carbon mineralization occurs within wetland soils via redox processes  
84 mediated by microbial communities, and these processes contribute to pollution mitigation and  
85 atmospheric greenhouse gas flux (Conrad, 1996; Reddy & DeLaune, 2008). Wetland soils often  
86 become chemically structured with increasing depth through sequential reduction of electron  
87 acceptors that decrease in metabolic favorability to microbes due to thermodynamic constraints  
88 (Conrad, 1996; Reddy & DeLaune, 2008; Kögel-Knabner *et al.*, 2010). As microbial community  
89 metabolism changes in concert with soil chemical profiles, microbial community compositional  
90 shifts commonly reflect functional changes of the community (Lüdemann *et al.*, 2000; Edlund *et al.*,  
91 2008; Lipson *et al.*, 2015). However, while availability of electron acceptors may influence  
92 chemical and biological structure within wetland soils, concentration of carbon electron donors  
93 can influence the vertical stratification of redox processes (Achnich *et al.*, 1995; Alewell *et al.*,  
94 2008), and by extension, vertical microbial community structure (defined as relative proportions  
95 of microbial taxa within a community). As an example of how this may apply to natural  
96 environments, increased carbon and nutrient influx from anthropogenic activities (such as  
97 agricultural pressure) may impact microbial community structure within coastal wetlands. Impacts  
98 to microbial community composition may extend to shifts in chemical cycles and redox processes  
99 as consequence, as disturbance to microbial community structure can often lead to a shift in  
100 community function (Shade *et al.*, 2012). However, while community structure may be indicative  
101 of environmental gradients within wetlands, taxonomic identification of microbes which respond  
102 to human pressures is necessary to appreciate which fraction of wetland microbial communities  
103 are most sensitive to environmental disturbances.

104

105 Networks of microbial taxa exist within microbial communities, and impacts to individual  
106 members could affect entire networks (Faust & Raes, 2012). Thus, it is important explore  
107 hypothetical microbial networks within natural environments, and their relationships to changing  
108 environmental conditions. Understanding how microbial networks respond to physicochemical  
109 shifts could aide in predicting how a future change in environmental conditions (perhaps caused  
110 by anthropogenic activity) may impact local microbial communities. Further, identifying microbial

111 taxonomic and diversity responses to environmental stressors caused by human activity is the first  
112 step in developing biological indicators that can predict levels of anthropogenic stress on natural  
113 environments, such as wetlands. Physicochemical and biological indicators have been  
114 continuously developed to determine which biological taxa are most sensitive to anthropogenic  
115 pressures within freshwater wetlands, and by extension, how these biological responses can inform  
116 scientists and managers about the health of coastal wetlands along the Great Lakes (Uzarski *et al.*,  
117 2017). These indices have been established for physical and chemical attributes (such as nutrient  
118 levels, urbanization, land use, etc.), as well as several eukaryotic taxonomic groups (e.g.,  
119 macrophytes, macroinvertebrates, fish, anurans, and birds) (Uzarski *et al.*, 2017). However, as  
120 different taxonomic indicators highlight unique pressures on wetland systems, indicators based on  
121 different biological groups can often conflict in their assessment of wetland ecosystem health. As  
122 such, it is necessary to examine a wide range of biological indicators to assess different aspects of  
123 wetland ecosystem health. A biological index for bacteria and archaea has yet to be developed for  
124 responses to human impacts within freshwater coastal wetlands (Uzarski *et al.*, 2017). A first step  
125 in establishing a microbial index is to uncover specific networks of microbial taxa (Sims *et al.*,  
126 2013; Urakawa & Bernhard, 2017) and diversity patterns found to be related to environmental  
127 gradients linked to anthropogenic activity (e.g., soil nutrient levels) among Great Lakes coastal  
128 wetlands.

129

130 This study sought to provide an initial characterization of microbial communities within  
131 soils of Great Lakes coastal wetlands bordering the western basin of Lake Erie, Saginaw Bay of  
132 Lake Huron, and northern Lake Michigan. Wetland sites explored in this study have been  
133 extensively researched over multiple years and vary widely in the degree to which they are  
134 impacted by human activity (Uzarski *et al.*, 2017). This study explored how environmental  
135 gradients among these coastal wetlands were related to microbial community structure among  
136 wetlands. Additionally, relationships among microbial communities and changing environmental  
137 conditions with increasing soil depth were also explored within each wetland site. It was predicted  
138 that microbial community structure would be related to environmental gradients among and within  
139 coastal wetland regions of the Great Lakes, and elevated nutrient levels within wetlands would  
140 decouple the relationship between microbial community structure and soil depth with respect to  
141 coastal wetlands lower in nutrient levels, as has been suggested in previous studies (Achnich *et*  
142 *al.*, 1995; Alewell *et al.*, 2008). Through high-throughput sequencing of the 16S rRNA gene and  
143 microbial network analyses, variations in key microbial taxa and subcommunities related to  
144 environmental gradients established by wetlands were identified.

145

## 146 **2. Material and Methods**

147

148 In the summer of 2014, wetland soil cores were collected within Laurentian Great Lakes  
149 coastal wetland ecosystems across several sites within several regions. Specifically, soil cores were  
150 collected from ten sites across five regions, including two sites in the western basin of Lake Erie  
151 (LE), three sites in eastern Saginaw Bay (ESBT), two sites in northern Saginaw Bay (NSB), two  
152 sites in western Saginaw Bay (WSB) in Lake Huron, and one site in the Beaver Island archipelago  
153 (BA) in Lake Michigan (Fig. 1). These sites were selected as they corresponded to environmental  
154 gradients, as well as human impact gradients based upon SumRank scores (an index assessing land  
155 use and water quality) as described in Uzarski *et al.* (2017) (Supplemental Fig. 1). Soil cores were  
156 collected by hand-driving plastic core tubes (~ 5 cm diameter) vertically into the soil. Among

157 wetlands, samples were collected within the same vegetation zone across sites (either dominated  
158 by cattails, genus *Typhus*, or bulrush, genus *Shoenoplectus*) as an attempt to control for collection  
159 bias, as different vegetation zones can harbor microbial communities distinct from other vegetation  
160 zones (Tang *et al.*, 2011). Cores were sampled to a depth of at least 6 cm (except for one core  
161 which was sampled to a depth of 4 cm) and were immediately flash frozen in a dry ice ethanol  
162 bath. Samples were transported on dry ice to Central Michigan University wherein they were  
163 stored at -80 °C.

164  
165 Triplicate cores were taken at five wetland sites while duplicate cores were taken at five  
166 other wetland sites. For sample extraction and sectioning, cores were extruded while still frozen  
167 via a custom-built core extruder. The edge of the core was warmed with a heat gun to allow the  
168 soil core to pass efficiently through the plastic container, however, the inner-core did not thaw  
169 during extrusion. Ice was applied to the plastic core liner to prevent accelerated thawing. Beginning  
170 from the top surface of soil, 2 cm sections were cut via an ethanol and flame-sterilized hacksaw  
171 blade and the sectioned core samples were placed into Whirl-Pak bags and stored at -80 °C. The  
172 extruder face plate was sterilized between cuts of the same core with ethanol. The extruder device  
173 was fully cleaned and sterilized between cores with physical scrubbing and ethanol sterilization.

## 174 175 **2.1 Microbial community analysis**

176  
177 Each soil sample was analyzed independently for microbial community analyses. DNA  
178 was extracted from ~ 0.25 g of soil using a MoBio PowerSoil DNA Isolation Kit (Mo Bio,  
179 Carlsbad, CA) following the standard manufacturer's protocol. Concentrations of extracted DNA  
180 were assessed using a Qubit® 2.0 fluorometer (Life Technologies, Carlsbad, CA) to ensure  
181 successful DNA extraction and quantification for sequence library preparation. DNA samples were  
182 sent to Michigan State University (East Lansing, MI) for library preparation and sequence analysis  
183 at the Research Technology Support Facility. The V4 region of the 16S rRNA gene was amplified  
184 for downstream sequencing with the commonly used primers 16Sf-V4 (515f) and 16Sr-V4 (806r)  
185 and a previously developed protocol (Caporaso *et al.*, 2012; Kozich *et al.*, 2013). Paired-end 250  
186 bp sequencing was accomplished via a MiSeq high-throughput sequencer (Illumina, San Diego,  
187 CA). Acquired DNA sequences were filtered for quality and analyzed using MOTHUR v 1.35.1  
188 (Schloss *et al.*, 2009) following the MiSeq SOP (available at <https://www.mothur.org/>) with  
189 modifications. Scripts used for sequence processing can be found at the GitHub repository  
190 associated with this study (<https://github.com/horto2dj/GLCW/>). Briefly, paired end sequences  
191 were combined into single contigs. Sequences that contained homopolymers > 8 bases, and those  
192 less than 251 or greater than 254 bp were removed. Sequences were aligned against the Silva (v  
193 119) rRNA gene reference database (Quast *et al.*, 2012). Sequences which did not align with the  
194 V4 region were also subsequently removed from analysis. Chimeric DNA was searched for and  
195 removed via UCHIME (Edgar *et al.*, 2011). Sequences were classified via the Ribosomal Database  
196 Project (training set v 9; Cole *et al.*, 2013) with a confidence threshold of 80. Sequences classified  
197 as chloroplast, mitochondria, eukaryotic, or unknown were removed. Remaining sequences were  
198 clustered into Operational Taxonomic Units (OTUs) at 0.03 sequence dissimilarity using the  
199 optclust clustering algorithm. Sequence data associated with this research have been submitted to  
200 the GenBank database under accession numbers SRR6261304 – SRR6261377 (Horton *et al.*,  
201 2017).

202

## 203 **2.2 Chemical analysis**

204

205 Each soil layer (top, middle, and bottom) was analyzed separately for local chemistry at  
206 each site. Within each site, soil samples of the same depth (i.e., top, middle, and bottom soil  
207 samples) among duplicate/triplicate cores were combined and homogenized to obtain enough soil  
208 for chemical analyses. For chemical analysis, soil samples were sent to Michigan State University  
209 Soil & Plant Nutrient Lab (East Lansing, MI) to analyze for percent total N (“TN”), total P (“TP”,  
210 ppm), total S (“TS”, ppm),  $\text{NO}_3^-$  (ppm),  $\text{NH}_4^+$  (ppm), percent organic matter (“OM”), percent  
211 organic carbon (“OC”), and C:N. In the field, a YSI multiprobe (YSI Inc., Yellow Springs, OH)  
212 was used to measure pH of the water residing directly above each collected soil core.

213

## 214 **2.3 Statistical analyses**

215

216 Statistical analyses were completed using R statistical software version 3.2.2 (R Core  
217 Team, 2015) unless otherwise stated. Code used for statistical analyses (and bioinformatic  
218 workflow) in this study can be found in the associated GitHub repository  
219 (<https://github.com/horto2dj/GLCW/>).

220

### 221 **2.3.1 Physicochemical analysis**

222

223 Differences in chemical profiles between samples within and among wetland regions were  
224 visualized using Principal Component Analysis (PCA). Prior to PCA, percentages were arcsin  
225 square root transformed and ratios were log transformed. Additionally, Pearson correlation  
226 analyses were performed to search for significant correlations between chemical variables.  
227 Collinearity in the dataset was addressed by combining highly correlated environmental variables  
228 ( $r > 0.7$ ,  $p \leq 0.001$ ). Only one of the correlated variables was included in PCA to remove  
229 exaggeration of correlated variables in PCA structure. Permutational Multivariate Analysis of  
230 Variance (perMANOVA; Anderson, 2001) was used to determine the influences of region and soil  
231 depth on physicochemical composition of samples, and 95% confidence intervals were established  
232 to compare differences among groups. Chemical depth profiles were also visualized for each  
233 wetland site to understand shifts in measured environmental variables with increasing soil depth.

234

### 235 **2.3.2 Alpha diversity analysis**

236

237 Alpha diversity analyses were performed to explore variation in OTU richness and  
238 evenness among wetland sites, regions, and soil depths, as well as to determine whether observed  
239 trends were driven by environmental variables. Prior to alpha diversity analyses, sequence  
240 abundance for each sample was subsampled to the lowest sequence abundance for any one sample  
241 ( $n = 48,226$  sequences). Singletons were maintained within the sequence dataset for alpha diversity  
242 analyses, as alpha diversity indices can be reliant on the presence of singletons for proper  
243 estimation. Alpha diversity was calculated for each site using MOTHUR, including Chao1  
244 richness and non-parametric Shannon diversity. Linear mixed-effect models and ANOVAs were  
245 used to test influences of wetland site, region, and soil depth on alpha diversity, controlling for  
246 wetland site as a random effect. Linear models and ANOVAs were used to test for variation in  
247 alpha diversity among wetland sites. If significant variation was found within an ANOVA result,  
248 post-hoc comparisons were implemented between sample groups using Tukey’s Honest

249 Significant Differences (HSD) tests with Bonferroni adjustments (p-values obtained by number of  
250 comparisons) for pairwise comparisons.

251

### 252 **2.3.3 Beta diversity analysis**

253

254 Beta diversity analyses were used to evaluate variation in microbial community structure  
255 among wetland sites, regions, and soil depths, and to assess the extent to which observed variation  
256 was explained by environmental conditions. Singletons and doubletons were removed from the  
257 dataset for beta diversity analyses. All sequence data were maintained for beta diversity analyses  
258 and transformed using the *DeSeq2* (Love *et al.*, 2014) package, which normalized OTU  
259 abundances among samples using a variance stabilizing transformation (VST) (McMurdie &  
260 Holmes, 2014). The *phyloseq* (McMurdie & Holmes, 2013) and *Vegan* (Oksanen *et al.*, 2007)  
261 packages were used to compare beta diversity among samples. Dissimilarity in microbial  
262 community structure among samples within and among sites was visualized using Non-metric  
263 Multidimensional Scaling (NMDS) plots based on pairwise Bray-Curtis dissimilarity estimates.  
264 The function *envfit* of the *Vegan* package was used to evaluate correlation between chemical  
265 parameters and microbial community structure among samples according to NMDS. “Depth” was  
266 also implemented as a dummy variable to test correlation between depth and microbial community  
267 structure.

268

269 To test for significant differences in beta diversity among wetland sites, regions, and soil  
270 depth, perMANOVA were implemented. Specifically, these tests evaluate significant variation  
271 among within group and between group means (Clarke, 1993; Anderson, 2001; Anderson &  
272 Walsh, 2013). If perMANOVA found significant differences among groups at the global level,  
273 pairwise perMANOVA tests between groups were implemented with Bonferroni significance  
274 adjustments to control for multiple pairwise comparisons. Anderson’s permutation of dispersions  
275 test (PERMDISP; Anderson, 2006; Anderson *et al.*, 2006) was used to test for differences in  
276 variance of community structure among sample groups (i.e. sites, regions, soil depths). Tukey’s  
277 Honest Significant Difference (HSD) tests were implemented with adjusted p-values for multiple  
278 pairwise comparisons if significant differences in dispersion were found among groups.

279

280 To explore relationships between regional microbial community structure and  
281 environmental variables, NMDS plots were generated for each individual region. Applying NMDS  
282 to each region also allowed for the assessment of the correlational relationship between community  
283 structure and soil depth (as a dummy variable) and other environmental variables (using the *envfit*  
284 function) within individual regions. To test for differences in microbial community structure  
285 between/among sites within a region, as well as among depths within a region, perMANOVA was  
286 implemented individually for each region.

287

### 288 **2.3.4 Network analyses**

289

290 To explore relationships between microbial sub-communities and individual OTUs to  
291 environmental variables, Weighted Correlation Network Analysis (WGCNA) was implemented  
292 on OTU relative abundances using the *WGCNA* package (Langfelder & Horvath, 2008; Langfelder  
293 & Horvath, 2012), executed as previously described (Guidi *et al.*, 2016; Henson *et al.*, 2016) with  
294 modifications. OTUs which did not possess at least 2 sequences across 10% of samples were

295 removed from network analyses. These OTUs were removed to eliminate OTUs with potentially  
296 spurious correlations to environmental variables or other OTUs, as well as to reduce computational  
297 stress of analyses. Remaining OTU abundances across samples were normalized using variance  
298 stabilizing transformation (VST) performed as described previously for beta diversity analyses.  
299 To ensure scale-free topology of the network, the dissimilarity matrix generated through VST was  
300 transformed to an adjacency matrix by raising this dissimilarity matrix to a soft threshold power.  
301 A threshold power of  $p = 4$  was chosen to meet scale-free topology assumptions based upon  
302 criterion established by Zhang & Horvath (2005). Scale-free topology of network relationships  
303 was further ensured through regression of the frequency distribution of node connectivity against  
304 node connectivity; a network is scale-free if an approximate linear fit of this regression is evident  
305 (see Zhang & Horvath, [2005] for more in-depth explanation). A topological overlap matrix  
306 (TOM) was generated using the adjacency matrix, and subnetworks of highly connected and  
307 correlated OTUs were delineated with the TOM and hierarchical clustering. Representative  
308 eigenvalues of each subnetwork (i.e., the first principal component) were correlated (Pearson) with  
309 values of measured environmental variables to identify the subnetworks most related to said  
310 environmental variables. The subnetworks with the highest positive correlations to environmental  
311 variables of interest (e.g.,  $\text{NO}_3^-$ , C:N, etc.) were selected for further analyses of relationships among  
312 subnetwork structure, individual OTUs, and environmental variables. Partial Least Square  
313 regression (PLS) was used to test predictive ability of subnetworks in estimating variability of  
314 environmental parameters, which allowed for delineation of potential indicator subnetworks and  
315 OTUs. Pearson correlations were calculated between response variables and leave-one-out cross-  
316 validation (LOOCV) predicted values. If PLS found that regression between actual and predicted  
317 values was below minimum threshold of  $R^2 = 0.3$ , WGCNA analysis was halted for that network,  
318 as the network was deemed to lack predictive ability of that environmental variable. Variable  
319 Importance in Projection (VIP) (Chong & Jun, 2005) analysis was used to determine the influence  
320 of individual OTUs in PLS. A high VIP value for an OTU indicates high importance in prediction  
321 of the environmental response variable for that OTU. For network construction and visualization  
322 purposes, the minimum correlation value required between two OTUs to constitute an “edge”  
323 between them was delineated at different  $r$  values for each network related to an individual  
324 environmental variable (ranging between 0.1 – 0.25), as co-correlations between OTUs within  
325 some networks were stronger than others. The number of co-correlations an OTU has with other  
326 OTUs within a network defines its “node centrality” (as described by Henson *et al.*, 2016).

327

### 328 **3. Results**

329

#### 330 **3.1 Chemical analyses**

331

332 Significant correlations ( $r > 0.7$ ,  $p \leq 0.001$ ) were found among  $\text{NH}_4^+$ , OM, OC, and TN.  
333 Thus, downstream analyses combined these values into one parameter, “NUTR”, represented by  
334 OM values as this variable was the most strongly correlated with each of the other variables.  
335 Environmental data were analyzed with a PCA and PC1 and PC2 explained 56.2% and 20.6% of  
336 the variation among samples, respectively (Fig. b). perMANOVA found significant differences in  
337 physicochemical profiles based on region ( $R^2 = 0.570$ ,  $p \leq 0.001$ ) and depth ( $R^2 = 0.058$ ,  $p \leq 0.01$ ).  
338 Lake Erie coastal wetlands were chemically distinct from other wetland regions (ESBT and NSB;  
339 adjusted  $p = 0.01$ ) according to perMANOVA and pairwise perMANOVA based on Euclidean  
340 distance. Ninety-five percent confidence intervals demonstrated no overlap between Lake Erie



341 coastal wetlands and other coastal wetlands (Fig. 2). This separation was related to increased  
342 NUTR,  $\text{NO}_3^-$ , and S.

343 Increasing depth within cores showed a consistent shift in environmental variables, except  
344 in those sites located in the western basin of Lake Erie (Supplemental Fig. 2). Specifically, OM,  
345 OC, and TN consistently decreased with increasing depth within each region except Lake Erie.  
346 Similarly, C:N increased with depth in each region except Lake Erie, wherein the C:N ratio  
347 remained relatively low ( $\sim 12$ ) and stable with increasing soil depth. Within the Lake Erie wetland  
348 region, pH was more acidic in the overlying water with respect to all other wetland regions  
349 (Supplemental Table 1). However, pH was still relatively neutral within Lake Erie (average pH =  
350  $7.26 \pm 0.24$ ), whereas other wetland regions (regions within Saginaw Bay and Beaver Archipelago)  
351 experienced slightly more basic pH, with average pH among these regions ranging between 7.72  
352 – 8.39.

353

### 354 **3.2 Alpha diversity**

355

356 Sufficient depth of sampling was reinforced by rarefaction curve analysis (Supplemental  
357 Fig. 3). Good's coverage values ranged between 89.3 – 93.5% for each region at the subsampled  
358 value of 48,226 sequences. Chao1 richness estimates varied significantly among wetland regions  
359 ( $F = 8.38$ ,  $p \leq 0.05$ ), as well as wetland sites ( $F = 16.78$ ,  $p \leq 0.001$ ). Pairwise comparisons found  
360 that the LE region had significantly higher ( $p \leq 0.01$ ) Chao1 estimates than NSB and WSB regions  
361 (Fig. 3; Supplemental Table 2). Additionally, pairwise comparisons found a high degree of  
362 significant variability ( $p \leq 0.01$ ) in Chao1 estimates among wetland sites (Supplemental Table 2).  
363 Further, Shannon diversity levels also significantly varied among wetland sites ( $F = 4.57$ ,  $p \leq$   
364  $0.001$ ), with site LE\_D having significantly higher ( $p \leq 0.01$ ) Shannon diversity levels than sites  
365 ESBT\_A and WSB\_B (Supplemental Table 2). Soil depth did not influence alpha diversity levels.

366

367 Shannon diversity and Chao1 were both positively correlated with measured environmental  
368 variables (Table 1). Specifically, Chao1 estimates increased with  $\text{NO}_3^-$ , P, and S concentrations ( $p$   
369  $\leq 0.01$ ), and were weakly positively correlated ( $p \leq 0.05$ ) with NUTR. Additionally, Shannon  
370 diversity levels increased alongside NUTR and S ( $p \leq 0.001$ ), and were weakly positively  
371 correlated with  $\text{NO}_3^-$  ( $p \leq 0.05$ ). There were no significant relationships between alpha diversity  
372 and C:N, and alpha diversity was not negatively correlated with any of the measured environmental  
373 variables.

374

### 375 **3.3 Beta diversity**

#### 376 **3.3.1 Beta diversity among regions**

377

378 Multivariate analyses were implemented to explore relationships between microbial  
379 communities and environmental gradients among wetland regions. NMDS demonstrated  
380 separation of microbial communities based on wetland site, region, and soil depth (Fig. 4).  
381 Substantiating this result, perMANOVA confirmed that differences in microbial community  
382 structure were significantly related to wetland region ( $R^2 = 0.220$ ,  $p \leq 0.001$ ), site ( $R^2 = 0.119$ ,  $p \leq$   
383  $0.001$ ), and soil depth ( $R^2 = 0.070$ ;  $p \leq 0.001$ ). Post-hoc pairwise perMANOVA found that  
384 community structure within the LE region was significantly distinct ( $p \leq 0.01$ ) from all other  
385 wetland regions (Table 2). No significant differences in community structure were found between  
386 any other wetland regions compared. Additionally, microbial community beta diversity was

387 distinct ( $p \leq 0.003$ ) between the top soil depth and the middle and bottom soil depths. However,  
388 no significant differences in microbial community structure were found between the middle and  
389 bottom soil depths (Table 2). Variation in microbial community structure was significantly  
390 correlated ( $p \leq 0.001$ ) to depth ( $r = 0.41$ ),  $\text{NO}_3^-$  ( $r = 0.20$ ), NUTR ( $r = 0.60$ ), and S ( $r = 0.41$ ), and  
391 also correlated ( $p \leq 0.016$ ) with C:N ( $r = 0.11$ ) and P ( $r = 0.14$ ) (Supplemental Table 3).

392

393 Beta dispersion tests suggested significant variation in structural variance among regions  
394 ( $p \leq 0.05$ ), however, Tukey's HSD test using adjusted p-values for multiple comparisons did not  
395 find any significance ( $p > 0.05$ ) between pairwise comparisons of regional groups. There were no  
396 differences in community structural dispersion among soil depths.

397

### 398 **3.3.2 Beta diversity within regions**

399

400 Microbial community associations with environmental variables were also explored within  
401 regions to examine variation among wetland sites. Individual NMDS plots of each region  
402 identified relationships between microbial community structure and several environmental  
403 variables using vector-fitting regression, and strengths of these relationships were dependent upon  
404 the wetland region explored (Fig. 5; Supplemental Table 3). Depth was significantly related ( $p \leq$   
405  $0.05$ ) to microbial community structure in all wetland regions except NSB and LE. However,  
406 microbial community structure may have been more strongly related to depth in NSB ( $r = 0.35$ ,  $p$   
407  $= 0.071$ ) than LE ( $r = 0.19$ ,  $p = 0.40$ ). NUTR was significantly related ( $p \leq 0.01$ ) to community  
408 structure within regions BA ( $r = 0.82$ ), ESBT ( $r = 0.51$ ), and LE ( $r = 0.66$ ). C:N was related ( $p \leq$   
409  $0.01$ ) to community structure within regions of Saginaw Bay (i.e., ESBT [ $r = 0.65$ ], NSB [ $r = 0.58$ ],  
410 and WSB [ $r = 0.58$ ]). Beta diversity was not significantly associated with concentrations of  $\text{NO}_3^-$   
411 in any region.

412

413 To test for significant differences in microbial beta diversity within regions, perMANOVA  
414 was used to evaluate differences in microbial community structure among soil depths and sites  
415 within wetland regions (Supplemental Table 3). Depth did not significantly explain microbial  
416 community structure within the region LE ( $p = 0.65$ ), however, it did explain differences in  
417 microbial community structure within the other wetland regions, specifically BA ( $R^2 = 0.414$ ;  $p =$   
418  $0.006$ ), ESBT ( $R^2 = 0.154$ ;  $p = 0.001$ ), NSB ( $R^2 = 0.161$ ;  $p = 0.093$ ), and WSB ( $R^2 = 0.259$ ;  $p =$   
419  $0.014$ ). Significant differences in microbial community structure were found among different  
420 wetland sites within regions ESBT ( $R^2 = 0.192$ ;  $p = 0.001$ ), LE ( $R^2 = 0.236$ ;  $p = 0.004$ ), and NSB  
421 ( $R^2 = 0.140$ ;  $p = 0.003$ ). As only one site was sampled within the BA region, testing for differences  
422 among wetland sites within the BA region could not be accomplished.

423

### 424 **3.4 Network analyses**

425

426 Weighted Correlation Network Analysis (WGCNA) was used to explore strong  
427 relationships between subcommunities and individual OTUs with environmental parameters  
428 within Great Lakes coastal wetlands. After removal of OTUs that did not have at least two  
429 representative sequences in at least 10% of samples, a total of 7,562 OTUs remained for WGCNA.  
430 In determining scale-free topology of the OTU network, a soft power threshold of 4 was reached,  
431 and an  $R^2$  of 0.87 was established as linear fit from the regression of the frequency distribution of  
432 node connectivity against node connectivity (Supplemental Fig. 4). Of the 33 constructed

433 subnetworks, the same one (subnetwork “orange”) was found to be most strongly correlated to  
434 both NUTR ( $r = 0.94$ ) and  $\text{NO}_3^-$  ( $r = 0.55$ ) (Supplemental Fig. 5). A separate subnetwork (“pink”)  
435 was strongly correlated ( $r = 0.74$ ) to C:N. All correlations of subnetworks to environmental  
436 variables were significant ( $p \leq 0.001$ ). OTU VIP values  $\leq 1$  were removed due to the large amount  
437 of OTUs within subnetworks correlated with C:N for visualization purposes.

438  
439 For subnetwork relationships to NUTR (including OM, OC,  $\text{NH}_4^+$ , and TN), partial least  
440 squares analysis (PLS) found that 69 OTUs were 93.8% predictive of variance in NUTR  
441 (Supplemental Fig. 6). OTU co-correlation networks were constructed using an OTU co-  
442 correlation threshold of 0.25, with strong correlations ( $r > 0.59$ ) between all OTUs and NUTR  
443 (Fig. 6). Of the top 15 OTUs contributing to PLS regression by VIP score, seven were related to  
444 *Betaproteobacteria*, five were related to *Anaerolineaceae* (within *Chloroflexi*), and one  
445 representative OTU was related to each of *Bellilinea* (*Chloroflexi*), *Desulfobacterales*  
446 (*Deltaproteobacteria*), and *Rhizobiales* (*Alphaproteobacteria*).

447  
448 For subnetwork relationships to C:N, PLS found that 144 OTUs were 59.0% predictive of  
449 variance in C:N (Supplemental Fig. 7). Networks were constructed using an OTU co-correlation  
450 threshold of 0.1, within positive or negative correlations ( $r > \pm 0.2$ ) between OTUs (VIP > 1) and  
451 C:N (Fig. 7). Of the top 15 OTUs by VIP score within the network, two OTUs related to  
452 *Bacteroidetes* were negatively correlated with C:N. Other top OTUs were positively related to  
453 C:N, including seven OTUs related to *Anaerolineaceae*, four OTUs which were unclassified  
454 *Bacteria*, and one representative OTU related to each of *Bacillus* (*Firmicutes*) and *Chloroflexi*.

## 455 456 **4. Discussion**

### 457 458 **4.1 Microbial diversity driven by chemistry within Great Lakes coastal wetlands**

459  
460 This study is the first to suggest that anthropogenic disturbance patterns correspond to  
461 microbial community differences in Great Lakes coastal wetlands as consistent with other  
462 taxonomic groups such as plants, birds, fish, and invertebrates (Howe *et al.*, 2007; Tulbure *et al.*,  
463 2007; Uzarski *et al.*, 2009; Cooper *et al.*, 2012; Uzarski *et al.*, 2017). Microbial community  
464 structure was significantly dissimilar between LE and all other wetland regions, and these  
465 differences were related to physicochemical differences among coastal wetlands (Fig. 2, Fig. 4,  
466 Table 2). As the wetlands within the Lake Erie region maintained the highest nutrient  
467 concentrations within the soil, it is possible that anthropogenic stressors related to nutrient loading  
468 (and potentially other pollutants) could be driving structural differences in microbial communities  
469 among Great Lakes coastal wetlands. Further, network analysis found several taxa/sub  
470 communities that were highly correlated to nutrient levels across wetlands explored in this study.  
471 Previous research has found that nutrient levels (e.g., C, N, P, etc.), to varying degrees, can  
472 influence microbial community composition and structure (Hartman *et al.*, 2008; Peralta *et al.*,  
473 2013; Ligi *et al.*, 2014; Arroyo *et al.*, 2015). Lake Erie coastal wetlands (and the watershed which  
474 drains into them) have been historically impacted by anthropogenic pollution and agricultural  
475 practices, particularly in comparison to other coastal wetlands within the Laurentian Great Lakes  
476 region. This has been demonstrated by multiple ecological indices (e.g., Cvetkovic & Chow-  
477 Fraser, 2011; Uzarski *et al.*, 2017) and physicochemical uniqueness (increased levels of nutrients  
478 and particulate matter) within the western basin of Lake Erie (Danz *et al.*, 2007; Trebitz *et al.*,

## Coastal wetland microbial communities

479 2007; Cvetkovic & Chow-Fraser, 2011; Uzarski *et al.*, 2017). Data presented in this study  
480 corroborate this historical evidence of human impact and nutrient loading in the western basin of  
481 Lake Erie (Fig. 2., Supplemental Fig. 1), which may be influencing the Lake Erie wetlands  
482 explored in this study.

483  
484 High nutrient influx could also be influencing the chemical and microbial vertical structure  
485 within coastal wetland soils. Microbial community and chemical (e.g., C, N, P) vertical structure  
486 was not evident within the first 6 cm of soil of coastal wetlands with elevated nutrient levels (e.g.  
487 Lake Erie sites). The lack of vertical chemical gradients is unlikely to exclusively explain a  
488 corresponding lack of vertical microbial community structure, as some wetland sites lower in  
489 nutrient levels also did not experience vertical chemical gradients in this study (e.g. West Saginaw  
490 Bay). One possibility is that a lack of vertical chemical structure in conjunction with high nutrient  
491 levels in wetland soils could reduce vertical microbial community structure. It has been previously  
492 demonstrated that concentrations of carbon electron donors may influence redox gradients within  
493 wetland soils (Acht nich *et al.*, 1995), and wetland microbial communities have been demonstrated  
494 to correspond with soil redox gradients (Lüdemann *et al.*, 2000; Edlund *et al.*, 2008; Lipson *et al.*,  
495 2015). However, connections between microbial community metabolic shifts with soil depth and  
496 levels of dissolved organic carbon *in situ* remain unresolved in freshwater wetlands (Alewell *et*  
497 *al.*, 2008). Alternatively, another explanation for lack of vertical community structure could be  
498 microsite heterogeneity throughout the soil matrix. Previous research in freshwater wetland soils  
499 has suggested that microsite heterogeneity may explain coexistence of microbial functional guilds  
500 (Alewell *et al.*, 2008; Angle *et al.*, 2017), which could substantially reduce vertical microbial  
501 community structural gradients. However, it is necessary to better link microbial community  
502 diversity, microbial activity, chemical structure, and microsite heterogeneity to establish  
503 relationships between microbial communities and freshwater soil structure. As a caveat, it is  
504 possible that chemical and microbial structuring still exists within wetlands with high nutrient  
505 levels, yet is not evident within the first 6 cm of soil or at the spatial scale measured in this study.  
506 Nevertheless, microbial communities within coastal wetlands with high nutrient levels did not  
507 follow the same pattern of vertical structure evident in other comparable coastal wetlands, either  
508 chemically or biologically, further suggesting that the microbial integrity of coastal wetland  
509 systems may be susceptible to negative anthropogenic pressure.

510  
511 While relationships between microbial diversity and nutrient levels among coastal  
512 wetlands are strong, other unexplored variables unique to Lake Erie (such as geologic history)  
513 could also be influencing uniqueness of chemical and microbial profiles in Lake Erie coastal  
514 wetlands. The Lake Erie coastal wetland sites explored here were barrier (protected) wetlands,  
515 while other wetland sites explored in this study are all classified as lacustrine (open water)  
516 wetlands ([www.greatlakeswetlands.org](http://www.greatlakeswetlands.org)). As such, wave action from the Great Lakes impacted  
517 wetlands within the western basin of Lake Erie to a lesser degree than other wetlands, thereby  
518 reducing sediment export rates into the Great Lakes themselves. Hydrologic energy was found to  
519 impact wetland primary productivity and respiration in Lake Huron coastal wetlands, suggesting  
520 Great Lakes ecosystems may exert unique environmental forces on wetland microbial  
521 communities (Cooper *et al.*, 2013). Low carbon export rates or elevated sedimentation rates may  
522 exist in the western basin of Lake Erie as consequence of low wave action in these wetlands, which  
523 may influence the chemical and biological structure (such as vertical microbial community  
524 structure) within wetland soils of this region. Nevertheless, previous research at the same wetland

525 locations explored in this study have demonstrated that wetlands within the western basin of Lake  
526 Erie are highly degraded with respect to other wetlands (Uzarski *et al.*, 2017), particularly with  
527 respect to physicochemical conditions. Additionally, the same vegetation zone (dominated by  
528 cattails or bulrush) was sampled among all wetlands explored in this study as an attempt to reduce  
529 bias in distinct environmental conditions which may exist in other vegetation zones among wetland  
530 sites. Burton *et al.* (2002) suggested that soil organic content was related to plant zonation in Great  
531 Lakes coastal wetlands. Further research would be necessary to fully tease apart the effects of  
532 anthropogenic stress and other natural contributions to differences in microbial communities  
533 among coastal wetlands.

534  
535

#### 536 **4.2 Relationships between microbial subnetworks and environmental gradients**

537

538 Through network analyses, multiple subcommunities were delineated which were  
539 significantly related to environmental gradients (such as nutrients C, N, and P) among coastal  
540 wetlands sampled in this study. Specifically, a subnetwork of 69 microbial taxa was 93.8%  
541 predictive of nutrient level variation among coastal wetland soils. Several microbial taxa within  
542 this subcommunity were individually predictive of nutrient levels to a high degree, including  
543 several OTUs related to *Anaerolineaceae*, one OTU related to genus *Anaerolinea*, and another  
544 related to genus *Bellilinea*. From the genus *Anaerolinea*, two thermophilic chemoorganotrophs  
545 (*Anaerolinea thermophila* and *Anaerolinea thermolimosa*) have been isolated (Sekiguchi *et al.*,  
546 2003; Yamada *et al.*, 2006). Only one isolated member has been established within the genus  
547 *Bellilinea* (*Bellilinea caldifistulae*); it has been described as a thermophilic, fermentative, obligate  
548 anaerobe which thrives in co-culture with methanogens (Yamada *et al.*, 2007). It is unlikely that  
549 the OTUs found in our study are the same species as the isolated *Anaerolinea* and *Bellilinea*  
550 species, as coastal wetland soils are not high-temperature environments necessary for thermophilic  
551 species. Additionally, no OTUs related to methanogenic archaea were found within this  
552 subnetwork, suggesting that *Anaerolineaceae* OTUs within coastal wetland soils may fluctuate  
553 independently of any specific methanogenic OTUs. It is possible that the *Bellilinea* OTU found  
554 within the subnetwork is related to nutrient level concentrations. This would support fermentative  
555 metabolism as noted within *Bellilinea caldifistulae*. It is important to note that several other studies  
556 have discovered OTUs related to *Anaerolineaceae* within wetland soils, with upwards of 90%  
557 relative abundance among *Chloroflexi* OTUs within these systems (Ansola *et al.*, 2014; Deng *et*  
558 *al.*, 2014; Hu *et al.*, 2016). This suggests that there are probable mesophilic species yet to be  
559 isolated within this ubiquitous family of bacteria, which may be of high importance within wetland  
560 soils.

561

562 *Betaproteobacteria* were also found to significantly predict nutrient levels among coastal  
563 wetlands. Hu *et al.* (2016) found that both *Betaproteobacteria* and *Anaerolineae* were positively  
564 related to TN levels, which is consistent with the data presented here, and these two taxa were  
565 suggested to contribute to higher levels of heterotrophic activity. Further, *Anaerolineaceae* OTUs  
566 were consistently related to increasing C:N, suggesting that many taxa within this family have  
567 preference for recalcitrant carbon sources. As C:N also tends to increase with soil depth, it is also  
568 probable that the putatively obligate anaerobic *Anaerolineaceae* are coinciding with decreasing  
569 oxygen levels and/or changing metabolism requirements with increasing soil depth.

570

571 Development of biological indices and establishment of indicator taxa have been suggested  
572 as necessary for microbial communities within wetlands (Uzarski *et al.*, 2017), particularly through  
573 the use of high-throughput sequencing technologies which now allow for deep assessment of  
574 microbial community composition and structure within environmental samples (Sims *et al.*, 2013;  
575 Urakawa & Bernhard, 2017). Specifically within Great Lakes coastal wetlands, it is integral to  
576 develop ecosystem health indicators based upon multiple different groups of taxonomy, as separate  
577 biological indices can present contrasting assessments of wetland health (Uzarski *et al.*, 2017). As  
578 microbial indicators have yet to be established in Great Lakes coastal wetlands, this research  
579 begins the first steps in exploring how microbial communities can be used as an additional and  
580 potentially important ecosystem health indicator. In addition to their importance as biological  
581 signals for environmental health, microbial indicator taxa may play prominent roles in  
582 bioremediation of excess nutrients and pollutants found within anthropogenically impacted coastal  
583 wetlands. Network analyses in this study have allowed for the generation of hypothetical  
584 subcommunities of diverse microbial taxa related to nutrient levels among Great Lakes coastal  
585 wetlands, and could assist in further understanding of which microbial taxa may be responding to  
586 anthropogenic stress in these ecosystems.

587

## 588 **5. Conclusions**

589

590 This study marks the first characterization of microbial communities within Great Lakes  
591 coastal wetlands. Coastal wetlands are integral in the proper functioning of biogeochemical cycles  
592 and environmental sustainability of the Great Lakes. While it has long been known that  
593 anthropogenic pressure can impact animal and plant communities within these coastal wetlands,  
594 this is the first evidence that these pressures may also be influencing microbial communities and  
595 may be influencing biogeochemical cycles by extension. Alpha and beta diversity were both  
596 related to nutrient gradients among and within regions, suggesting that variability in microbial  
597 community structure is highly coupled to geochemistry within wetland soils. We propose that  
598 wetland microbial community structure can also potentially be used to assess a wetland for  
599 monitoring purposes. As illustrated within this study, wetland microbial community structure and  
600 depth are decoupled within the wetlands experiencing the highest nutrient levels, likely originating  
601 from terrestrial inputs due to human activity. As such, multivariate statistics (as used in the  
602 methods of this study) may prove useful in examining relationships between wetland soil depth  
603 and microbial community structure alongside microbial network analyses, which could provide  
604 biological indicators of nutrient loading stress on coastal wetland habitats. We propose that  
605 wetland microbial community structure can also potentially be used to assess a wetland for  
606 monitoring purposes.

607

608 Further, this study provides insight on microbial community subnetworks and individual  
609 OTUs, which were predictive of chemical concentrations, and may be useful for future  
610 management of Great Lakes coastal wetland systems. Within subnetworks existed multiple taxa  
611 with strong individual relationships to environmental gradients among coastal wetlands throughout  
612 the Great Lakes. Even further, several community members within these subnetworks were  
613 taxonomically related (such as OTUs related to *Anaerolineaceae* within *Chloroflexi*), suggesting  
614 that specific taxonomic groups of microbes may be useful to explore further as potential biological  
615 indicator groups. This study highlights the strength of network analyses (such as WGCNA) in

616 delineating hypothetical networks of interacting microbes, and whether these networks are  
617 predictive of physical or chemical gradients measured within an environment.

618

### 619 **Acknowledgements**

620

621 Special thanks to Alexandra Bozimowski and Thomas Langer for their assistance in  
622 collecting the wetland samples and data acquisition, as well as Dr. Matthew Cooper for providing  
623 valuable insight and conversation on wetland ecology and the custom-built core extruder built by  
624 Mr. Gary Cooper. Special thanks also to Mike Henson for providing assistance on network  
625 statistical analyses. This paper is Contribution Number XX of the Central Michigan University  
626 Institute for Great Lakes Research.

627

### 628 **Author Contributions Statement**

629

630 DH processed samples, analyzed data, and wrote the manuscript. DU provided access to the  
631 samples, aided sample selection, and statistical analysis. DL and KT provided guidance on  
632 microbial analysis and KT, DU, and DL assisted in editing the manuscript.

633

### 634 **Conflict of Interest Statement**

635

636 The authors declare no conflicts of interest.

637

### 638 **Funding Statement**

639

640 Funding was provided, in part, by the CMU College of Science and Engineering.  
641 Additional funding for this work was provided by the Great Lakes National Program Office under  
642 the United States Environmental Protection Agency, grant number GL-00E00612-0 as part of the  
643 US federal government's Great Lakes Restoration Initiative. Although the research described in  
644 this work has been partly funded by the United States Environmental Protection Agency, it has not  
645 been subjected to the agency's required peer and policy review, and therefore, does not necessarily  
646 reflect the views of the agency and no official endorsement should be inferred.

647

### 648 **Data Availability Statement**

649

650 Sequence data generated for this study can be found in the GenBank repository at  
651 <https://www.ncbi.nlm.nih.gov/bioproject/?term=PRJNA417157>. Other data generated for this  
652 study, along with R code for replication of statistical methodology, can be found in the GitHub  
653 repository at <https://github.com/horto2dj/GLCW/>.

654

### 655 **References**

656

657 Achtnich, C., Bak, F., and Conrad, R. (1995). Competition for electron donors among nitrate  
658 reducers, ferric iron reducers, sulfate reducers, and methanogens in anoxic paddy soil. *Biol Fert*  
659 *Soils*. 19(1), 65-72.

660

Coastal wetland microbial communities

- 661 Alewell, C., Paul, S., Lischeid, G., and Storck, F.R. (2008). Co-regulation of redox processes in  
662 freshwater wetlands as a function of organic matter availability?. *Sci Total Environ* 404(2), 335-  
663 342.
- 664
- 665 Anderson, M.J. (2001). A new method for non- parametric multivariate analysis of variance.  
666 *Austral Ecol* 26(1), 32-46.
- 667
- 668 Anderson, M.J. (2006). Distance- based tests for homogeneity of multivariate dispersions.  
669 *Biometrics* 62(1), 245-253.
- 670
- 671 Anderson, M.J., Ellingsen, K.E., and McArdle, B.H. (2006). Multivariate dispersion as a measure  
672 of beta diversity. *Ecol Lett* 9(6), 683-693.
- 673
- 674 Anderson, M.J., and Walsh, D.C. (2013). PERMANOVA, ANOSIM, and the Mantel test in the  
675 face of heterogeneous dispersions: what null hypothesis are you testing?. *Ecol Monogr* 83(4), 557-  
676 574.
- 677
- 678 Angle, J.C., Morin, T.H., Solden, L.M., Narrowe, A.B., Smith, G.J., Borton, M.A., *et al.* (2017).  
679 Methanogenesis in oxygenated soils is a substantial fraction of wetland methane emissions. *Nat*  
680 *Commun* 8(1), 1567.
- 681
- 682 Ansola, G., Arroyo, P., and de Miera, L.E.S. (2014). Characterisation of the soil bacterial  
683 community structure and composition of natural and constructed wetlands. *Sci Total Environ* 473,  
684 63-71.
- 685
- 686 Arroyo, P., de Miera, L.E.S., and Ansola, G. (2015). Influence of environmental variables on the  
687 structure and composition of soil bacterial communities in natural and constructed wetlands. *Sci*  
688 *Total Environ* 506, 380-390.
- 689
- 690 Burton, T.M., Stricker, C.A., and Uzarski, D.G. (2002). Effects of plant community composition  
691 and exposure to wave action on invertebrate habitat use of Lake Huron coastal wetlands. *Lakes &*  
692 *Reservoirs: Research and Management*. 7: 255-269.
- 693
- 694 Campbell, M., Cooper, M.J., Friedman, K., and Anderson, W.P. (2015). The economy as a driver  
695 of change in the Great Lakes–St. Lawrence River basin. *J Great Lakes Res* 41, 69-83.
- 696
- 697 Caporaso, J.G., Lauber, C.L., Walters, W.A., Berg-Lyons, D., Huntley, J., Fierer, N., *et al.* (2012).  
698 Ultra-high-throughput microbial community analysis on the Illumina HiSeq and MiSeq platforms.  
699 *ISME J* 6(8), 1621-1624.
- 700
- 701 Chong, I.G., and Jun, C.H. (2005). Performance of some variable selection methods when  
702 multicollinearity is present. *Chemometr Intell Lab* 78(1), 103-112.
- 703
- 704 Clarke, K.R. (1993). Non-parametric multivariate analyses of changes in community structure.  
705 *Aust J Ecol* 18, 117-143.
- 706



Coastal wetland microbial communities

- 707 Cole J.R., Wang Q., Fish J.A., Chai B., Mcgarrell D.M., Sun Y., *et al.* (2013) Ribosomal Database  
708 Project: data and tools for high throughput rRNA analysis. *Nucleic Acids Res* 42(D1),  
709 doi:10.1093/nar/gkt1244  
710
- 711 Conrad, R. (1996). Soil microorganisms as controllers of atmospheric trace gases (H<sub>2</sub>, CO, CH<sub>4</sub>,  
712 OCS, N<sub>2</sub>O, and NO). *Microbiol Rev* 60(4), 609-640.  
713
- 714 Cooper, M.J., Gyekis, K.F., and Uzarski, D.G. (2012). Edge effects on abiotic conditions,  
715 zooplankton, macroinvertebrates, and larval fishes in Great Lakes fringing marshes. *J Great Lakes*  
716 *Res* 38(1), 142-151.  
717
- 718 Cooper, M.J., Steinman, A.D., and Uzarski, D.G. (2013). Influence of geomorphic setting on the  
719 metabolism of Lake Huron fringing wetlands. *Limnol Oceanogr* 58(2), 452-464.  
720
- 721 Cvetkovic, M., and Chow-Fraser, P. (2011). Use of ecological indicators to assess the quality of  
722 Great Lakes coastal wetlands. *Ecological Indicators* 11(6), 1609-1622.  
723
- 724 Dahl, T.E. (1990). Wetlands losses in the United States 1780's to 1980's. U.S. Department of the  
725 Interior, Fish and Wildlife Service, Washington. D.C. 13pp.  
726
- 727 Danz, N.P., Niemi, G.J., Regal, R.R., Hollenhorst, T., Johnson, L.B., Hanowski, J.M., *et al.* (2007).  
728 Integrated measures of anthropogenic stress in the US Great Lakes basin. *Environ Manage* 39(5),  
729 631-647.  
730
- 731 Deng, Y., Cui, X., Hernández, M., and Dumont, M.G. (2014). Microbial diversity in hummock  
732 and hollow soils of three wetlands on the Qinghai-Tibetan Plateau revealed by 16S rRNA  
733 pyrosequencing. *PLoS One* 9(7), e103115.  
734
- 735 Edgar, R.C., Haas, B.J., Clemente, J.C., Quince, C., and Knight, R. (2011). UCHIME improves  
736 sensitivity and speed of chimera detection. *Bioinformatics* 27(16), 2194-2200.  
737
- 738 Edlund, A., Hårdeman, F., Jansson, J.K., and Sjöling, S. (2008). Active bacterial community  
739 structure along vertical redox gradients in Baltic Sea sediment. *Environ Microbiol* 10(8), 2051-  
740 2063.  
741
- 742 Faust, K., & Raes, J. (2012). Microbial interactions: from networks to models. *Nat Rev Microbiol*  
743 10(8), 538.  
744
- 745 Guidi, L., Chaffron, S., Bittner, L., Eveillard, D., Larhlimi, A., Roux, S., *et al.* (2016). Plankton  
746 networks driving carbon export in the oligotrophic ocean. *Nature* 532(7600), 465.  
747
- 748 Hackett, R.A., Babos, H.B., Collins, E.E., Horton, D., Schock, N., and Schoen, L.S. (2017).  
749 Researcher disciplines and the assessment techniques used to evaluate Laurentian Great Lakes  
750 coastal ecosystems. *J Great Lakes Res* 43(1), 9-16.  
751

## Coastal wetland microbial communities

- 752 Hartman, W.H., Richardson, C.J., Vilgalys, R., and Bruland, G.L. (2008). Environmental and  
753 anthropogenic controls over bacterial communities in wetland soils. *P Natl Acad Sci* 105(46),  
754 17842-17847.  
755
- 756 Hecnar, S.J. (2004). Great Lakes wetlands as amphibian habitats: a review. *Aquat Ecosyst Health*  
757 7(2), 289-303.  
758
- 759 Henson, M.W., Hanssen, J., Spooner, G., Flemming, P., Pukonen, M., Stahr, F., and Thrash, J.C.  
760 (2016). Nutrient dynamics and stream order influence microbial community patterns along a 2914  
761 km transect of the Mississippi River. *bioRxiv*, 091512.  
762
- 763 Hill, B.H., Elonen, C.M., Jicha, T.M., Cotter, A.M., Trebitz, A.S., and Danz, N.P. (2006).  
764 Sediment microbial enzyme activity as an indicator of nutrient limitation in Great Lakes coastal  
765 wetlands. *Freshwater Biol* 51(9), 1670-1683.  
766
- 767 Horton, D.J., Theis, K.R., Uzarski, D.G., Learman, D.R. Data from: Microbial community  
768 structure corresponds to nutrient gradients and human impact within coastal wetlands of the Great  
769 Lakes. *GenBank*. (2017). Accession: PRJNA417157  
770
- 771 Howe, R.W., Regal, R.R., Hanowski, J., Niemi, G.J., Danz, N.P., and Smith, C.R. (2007). An  
772 index of ecological condition based on bird assemblages in Great Lakes coastal wetlands. *J Great*  
773 *Lakes Res* 33(sp3), 93-105.  
774
- 775 Hu, Y., Wang, L., Fu, X., Yan, J., Wu, J., Tsang, Y., *et al.* (2016). Salinity and nutrient contents  
776 of tidal water affects soil respiration and carbon sequestration of high and low tidal flats of  
777 Jiuduansha wetlands in different ways. *Sci Total Environ* 565, 637-648.  
778
- 779 Jackson, C.R., Foreman, C.M., and Sinsabaugh, R.L. (1995). Microbial enzyme activities as  
780 indicators of organic matter processing rates in a Lake Erie coastal wetland. *Freshwater biol* 34(2),  
781 329-342.  
782
- 783 Kögel-Knabner, I., Amelung, W., Cao, Z., Fiedler, S., Frenzel, P., Jahn, R., *et al.* (2010).  
784 Biogeochemistry of paddy soils. *Geoderma* 157(1), 1-14.  
785
- 786 Kozich, J.J., Westcott, S.L., Baxter, N.T., Highlander, S.K., Schloss, P.D. (2013) Development of  
787 a Dual-Index Sequencing Strategy and Curation Pipeline for Analyzing Amplicon Sequence Data  
788 on the MiSeq Illumina Sequencing Platform. *Appl Environ Microb* 79(17), 5112-5120.  
789
- 790 Krantzberg, G., and De Boer, C. (2008). A valuation of ecological services in the Laurentian Great  
791 Lakes Basin with an emphasis on Canada. *Am Wat Works Assoc J* 100(6), 100.  
792
- 793 Lamers, L.P., Van Diggelen, J.M., den Camp, H.J.O., Visser, E.J., Lucassen, E.C., Vile, M.A., *et*  
794 *al.* (2012). Microbial transformations of nitrogen, sulfur, and iron dictate vegetation composition  
795 in wetlands: a review. *Front Microbiol*, 3:156.  
796

## Coastal wetland microbial communities

- 797 Langfelder, P., and Horvath, S. (2008). WGCNA: an R package for weighted correlation network  
798 analysis. *BMC Bioinformatics* 9(1), 559.  
799
- 800 Langfelder, P., and Horvath, S. (2012). Fast R functions for robust correlations and hierarchical  
801 clustering. *J Stat Softw* 46(11).  
802
- 803 Ligi, T., Oopkaup, K., Truu, M., Preem, J.K., Nõlvak, H., Mitsch, W.J., *et al.* (2014).  
804 Characterization of bacterial communities in soil and sediment of a created riverine wetland  
805 complex using high-throughput 16S rRNA amplicon sequencing. *Ecol Eng* 72, 56-66.  
806
- 807 Lipson, D.A., Raab, T.K., Parker, M., Kelley, S.T., Brislawn, C.J., and Jansson, J. (2015). Changes  
808 in microbial communities along redox gradients in polygonized Arctic wet tundra soils. *Env*  
809 *Microbiol Rep* 7(4), 649-657.  
810
- 811 Love, M.I., Huber, W., and Anders, S. (2014). Moderated estimation of fold change and dispersion  
812 for RNA-seq data with DESeq2. *Genome Biol* 15(12), 550.  
813
- 814 Lüdemann, H., Arth, I., and Liesack, W. (2000). Spatial changes in the bacterial community  
815 structure along a vertical oxygen gradient in flooded paddy soil cores. *Appl Environ Microb* 66(2),  
816 754-762.  
817
- 818 McMurdie, P.J., and Holmes, S. (2013) Phyloseq: an R package for reproducible interactive  
819 analysis and graphics of microbiome census data. *PLoS One* 8(4).  
820
- 821 McMurdie, P.J., and Holmes, S. (2014). Waste not, want not: why rarefying microbiome data is  
822 inadmissible. *PLoS Comput Biol*, 10(4), e1003531.  
823
- 824 Morrice, J.A., Danz, N.P., Regal, R.R., Kelly, J.R., Niemi, G.J., Reavie, E.D., *et al.* (2008). Human  
825 influences on water quality in Great Lakes coastal wetlands. *Environ Manage* 41(3), 347-357.  
826
- 827 Oksanen, J., Kindt, R., Legendre, P., O'Hara, B., Stevens, M.H.H., Oksanen, M.J., and Suggests,  
828 M.A.S.S. (2007). The vegan package. *Community ecology package*, 10, 631-637.  
829
- 830 Peralta, R.M., Ahn, C., and Gillevet, P.M. (2013). Characterization of soil bacterial community  
831 structure and physicochemical properties in created and natural wetlands. *Sci Total Environ* 443,  
832 725-732.  
833
- 834 Quast C., Pruesse E., Yilmaz P., Gerken J., Schweer T., Yarza P., *et al.* (2012). The SILVA  
835 ribosomal RNA gene database project: improved data processing and web-based tools. *Nucleic*  
836 *Acids Res* 41(D1), D590-D596.  
837
- 838 R Core Team (2015) R: A language and environment for statistical computing. Vienna, Austria.  
839 <https://www.R-project.org/>.  
840
- 841 Reddy, K.R., and DeLaune, R.D. (2008). *Biogeochemistry of wetlands: science and applications*.  
842 Boca Raton, FL: CRC Press.

Coastal wetland microbial communities

- 843  
844 Schloss, P.D., Westcott, S.L., Ryabin, T., Hall, J.R., Hartmann, M., Hollister, E.B., *et al.* (2009).  
845 Introducing mothur: Open-Source, Platform-Independent, Community-Supported Software for  
846 Describing and Comparing Microbial Communities. *Appl Environ Microbiol* 75(23), 7537-7541.  
847  
848 Shade, A., Peter, H., Allison, S. D., Baho, D., Berga, M., Bürgmann, H., *et al.* (2012).  
849 Fundamentals of microbial community resistance and resilience. *Front Microbiol* 3, 417.  
850  
851 Sekiguchi, Y., Yamada, T., Hanada, S., Ohashi, A., Harada, H., and Kamagata, Y. (2003).  
852 *Anaerolinea thermophila* gen. nov., sp. nov. and *Caldilinea aerophila* gen. nov., sp. nov., novel  
853 filamentous thermophiles that represent a previously uncultured lineage of the domain Bacteria at  
854 the subphylum level. *Int J Syst Evol Micr* 53(6), 1843-1851.  
855  
856 Sierszen, M.E., Morrice, J.A., Trebitz, A.S., and Hoffman, J.C. (2012). A review of selected  
857 ecosystem services provided by coastal wetlands of the Laurentian Great Lakes. *Aquat Ecosyst*  
858 *Health* 15(1), 92-106.  
859  
860 Sims, A., Zhang, Y., Gajaraj, S., Brown, P.B., and Hu, Z. (2013). Toward the development of  
861 microbial indicators for wetland assessment. *Water Res* 47(5), 1711-1725.  
862  
863 Tang, Y.S., Wang, L., Jia, J.W., Fu, X.H., Le, Y.Q., Chen, X.Z., and Sun, Y. (2011). Response of  
864 soil microbial community in Jiuduansha wetland to different successional stages and its  
865 implications for soil microbial respiration and carbon turnover. *Soil Biol Biochem* 43(3), 638-646.  
866  
867 Trebitz, A.S., Brazner, J.C., Cotter, A.M., Knuth, M.L., Morrice, J.A., Peterson, G.S., *et al.* (2007).  
868 Water quality in Great Lakes coastal wetlands: basin-wide patterns and responses to an  
869 anthropogenic disturbance gradient. *J Great Lakes Res* 33(sp3), 67-85.  
870  
871 Tulbure, M.G., Johnston, C.A., and Auger, D.L. (2007). Rapid invasion of a Great Lakes coastal  
872 wetland by non-native *Phragmites australis* and *Typha*. *J Great Lakes Res* 33(sp3), 269-279.  
873  
874 Urakawa, H., and Bernhard, A.E. (2017). Wetland management using microbial indicators. *Ecol*  
875 *Eng* 108(B), 456-476.  
876  
877 Uzarski, D.G. (2009). Wetlands of Large Lakes. *Encyclopedia of Inland Waters*. Oxford: Elsevier.  
878 p. 599-606.  
879  
880 Uzarski, D.G., Brady, V.J., Cooper, M.J., Wilcox, D.A., Albert, D.A., Axler, R.P, *et al.* (2017).  
881 Standardized measures of coastal wetland condition: Implementation at a Laurentian Great Lakes  
882 basin-wide scale. *Wetlands* 37(1), 15-32.  
883  
884 Uzarski, D.G., Burton, T.M., Kolar, R.E., and Cooper, M.J. (2009). The ecological impacts of  
885 fragmentation and vegetation removal in Lake Huron's coastal wetlands. *Aquat Ecosyst Health*  
886 12(1), 45-62.  
887

## Coastal wetland microbial communities

- 888 Wang, N., and Mitsch, W.J. (1998). Estimating phosphorus retention of existing and restored  
889 coastal wetlands in a tributary watershed of the Laurentian Great Lakes in Michigan, USA. *Wetl*  
890 *Ecol Manag* 6(1), 69-82.  
891
- 892 Yamada, T., Sekiguchi, Y., Hanada, S., Imachi, H., Ohashi, A., Harada, H., and Kamagata, Y.  
893 (2006). *Anaerolinea thermolimosa* sp. nov., *Levilinea saccharolytica* gen. nov., sp. nov. and  
894 *Leptolinea tardivitalis* gen. nov., sp. nov., novel filamentous anaerobes, and description of the new  
895 classes *Anaerolineae* classis nov. and *Caldilineae* classis nov. in the bacterial phylum Chloroflexi.  
896 *Int J Syst Evol Micr* 56(6), 1331-1340.  
897
- 898 Yamada, T., Imachi, H., Ohashi, A., Harada, H., Hanada, S., Kamagata, Y., and Sekiguchi, Y.  
899 (2007). *Bellilinea caldifistulae* gen. nov., sp. nov. and *Longilinea arvoryzae* gen. nov., sp. nov.,  
900 strictly anaerobic, filamentous bacteria of the phylum Chloroflexi isolated from methanogenic  
901 propionate-degrading consortia. *Int J Syst Evol Micr* 57(10), 2299-2306.  
902
- 903 Zhang, B., and Horvath, S. (2005). A general framework for weighted gene co-expression network  
904 analysis. *Stat Appl Genet Mol* 4(1).  
905  
906  
907  
908  
909

910 **Tables**

911

912 Table 1. Correlations between alpha diversity metrics and measured environmental variables.

913 Asterisks represent significance values where  $p \leq 0.001$  (\*\*\*),  $p \leq 0.01$  (\*\*), and  $p \leq 0.05$  (\*).

914

|                              | Chao1   | Shannon |
|------------------------------|---------|---------|
| P                            | 0.31**  | -0.09   |
| S                            | 0.42*** | 0.45*** |
| NO <sub>3</sub> <sup>-</sup> | 0.42*** | 0.24*   |
| C:N                          | -0.03   | -0.2    |
| NUTR                         | 0.24*   | 0.41*** |

915

916 Table 2. Pairwise perMANOVA results comparing pairwise differences between wetland regions

917 and differences between wetland soil depths. Values represent significant ( $p \leq 0.01$ ) R<sup>2</sup> results,

918 and *n.s.* represents lack of significance ( $p > 0.01$ ).

919

| Region | BA          | ESBT        | LE    | NSB         | WSB |
|--------|-------------|-------------|-------|-------------|-----|
| BA     | -           |             |       |             |     |
| ESBT   | <i>n.s.</i> | -           |       |             |     |
| LE     | 0.507       | 0.401       | -     |             |     |
| NSB    | <i>n.s.</i> | <i>n.s.</i> | 0.524 | -           |     |
| WSB    | <i>n.s.</i> | <i>n.s.</i> | 0.435 | <i>n.s.</i> | -   |

  

| Depth  | Top | Middle      | Bottom |
|--------|-----|-------------|--------|
| Top    | -   |             |        |
| Middle | **  | -           |        |
| Bottom | **  | <i>n.s.</i> | -      |

920

921

922 **Figures**

923

924 Figure 1. Geographic map displaying location of sites sampled within this study. Colors of points  
925 correspond to region sampled.

926

927 Figure 2. Principal Component Analysis (PCA) illustrating separation of samples based upon soil  
928 geochemistry. Shapes and colors correspond to different wetland depths and regions, respectively,  
929 as listed in the legend. Percentages on axes represent explained variance of that principal  
930 component. Vectors represent impact of specific environmental variables on sample distribution.  
931 NUTR represents OM values, which correlated significantly ( $p \leq .01$ ,  $r > 0.56$ ) to  $\text{NO}_3^-$ , OC, OM,  
932 S, and TN. Ellipses represent 95% confidence intervals of region groupings.

933

934 Figure 3. Boxplot diagram comparing Chao1 diversity among wetland regions. Boxes with the  
935 same letter are not significantly different, while those with no common letters are significantly  
936 different ( $p \leq 0.01$ ). Lines within boxes represent the median, hinges represent +/- 25% quartiles,  
937 whiskers represent up to 1.5x the interquartile range. Colors represent wetland region.

938

939 Figure 4. Nonmetric Multidimensional Scaling (NMDS) plot illustrating separation of samples  
940 based upon differences in microbial community structure. Shapes and colors correspond to  
941 different depths and wetland regions, respectively, as listed in the legend. Vectors represent  
942 correlations of environmental variables to the distribution of the microbial communities  
943 represented in the plot.

944

945 Figure 5. NMDS plots of each wetland region demonstrating separation of samples based upon  
946 differences in microbial community structure, including (A) BA, (B) ESBT, (C) LE, (D) NSB, and  
947 (E) WSB. Shapes and colors correspond to different depths and wetland sites, respectively, as  
948 listed in the legends. Vectors represent correlations of environmental variables to the distribution  
949 of microbial communities represented in the plots.

950

951 Figure 6. Network visualization and results of partial least squares analysis on the subnetwork  
952 most correlated with NUTR. The y-axis represents correlation of OTU to OC values, whereas the  
953 x-axis represents the node centrality. Points represent OTUs, and the color of points corresponds  
954 to the phylum to which an OTU belongs. Point size corresponds to VIP score of that OTU. The  
955 top 15 OTUs are labeled within the graph with corresponding lowest taxonomic identification  
956 possible, and the level of that classification. D = Domain; P = Phylum, C = Class, O = Order, F =  
957 Family, G = Genus.

958

959 Figure 7. Network visualization and results of partial least squares analysis on the subnetwork  
960 most correlated with C:N. The y-axis represents correlation of OTU to C:N, whereas the x-axis  
961 represents the node centrality. Points represent OTUs, and the color of points corresponds to the  
962 phylum to which an OTU belongs. Point size corresponds to VIP score of that OTU. Only OTUs  
963 with a VIP score  $> 1$  were displayed for visualization purposes. The top 15 OTUs are labeled  
964 within the graph with corresponding lowest taxonomic identification possible, and the level of that  
965 classification. D = Domain; P = Phylum, C = Class, O = Order, F = Family, G = Genus.

Figure 1.JPEG

bioRxiv preprint doi: <https://doi.org/10.1101/217919>; this version posted April 17, 2018. The copyright holder for this preprint (which was not certified by peer review) is the author/funder, who has granted bioRxiv a license to display the preprint in perpetuity. It is made available under aCC-BY-NC-ND 4.0 International license.

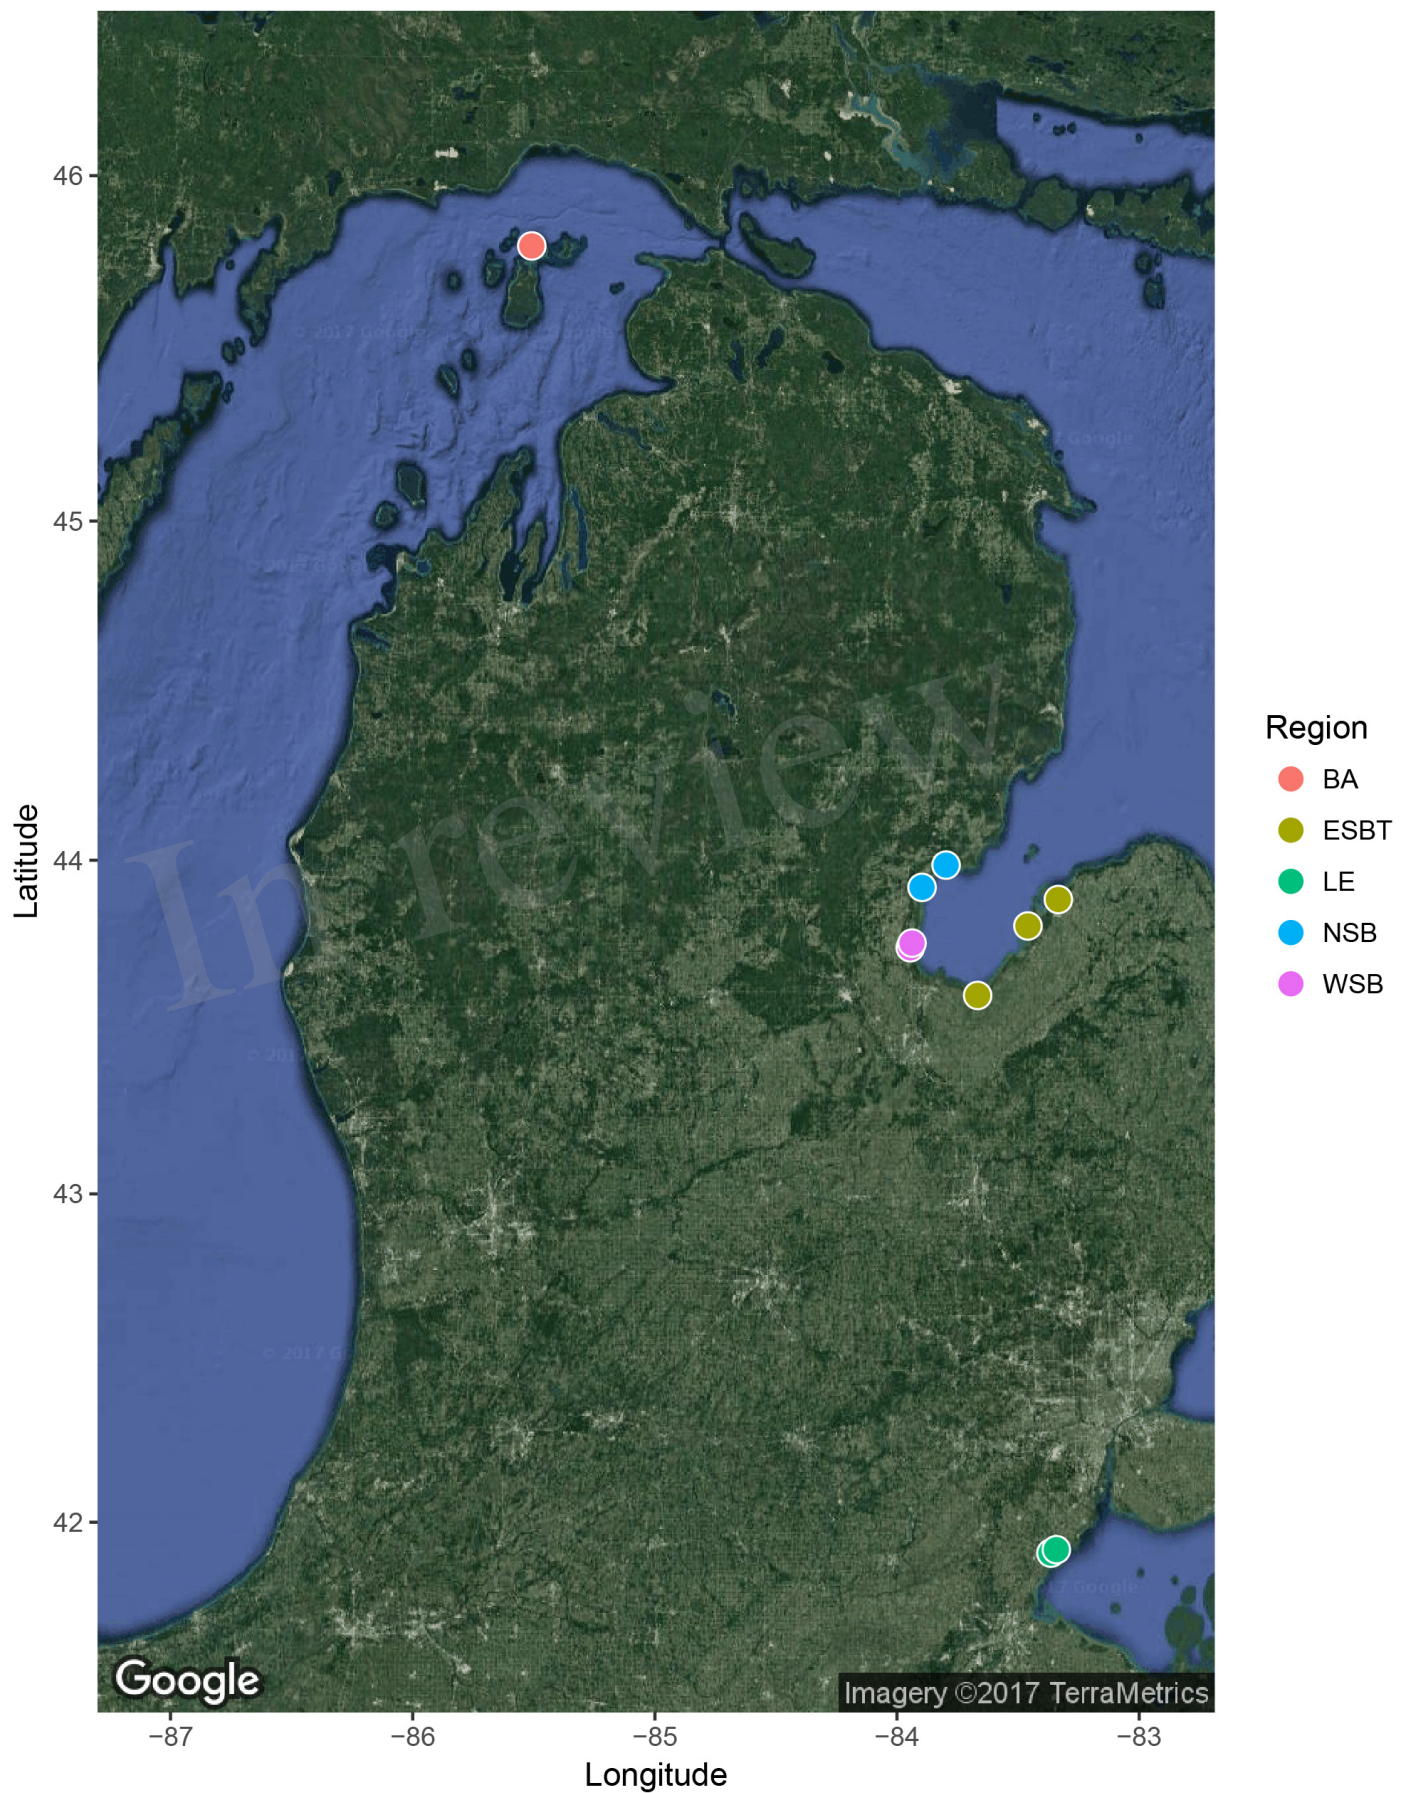



Figure 2.JPEG

bioRxiv preprint doi: <https://doi.org/10.1101/217919>; this version posted April 17, 2018. The copyright holder for this preprint (which was not certified by peer review) is the author/funder, who has granted bioRxiv a license to display the preprint in perpetuity. It is made available under aCC-BY-NC-ND 4.0 International license.

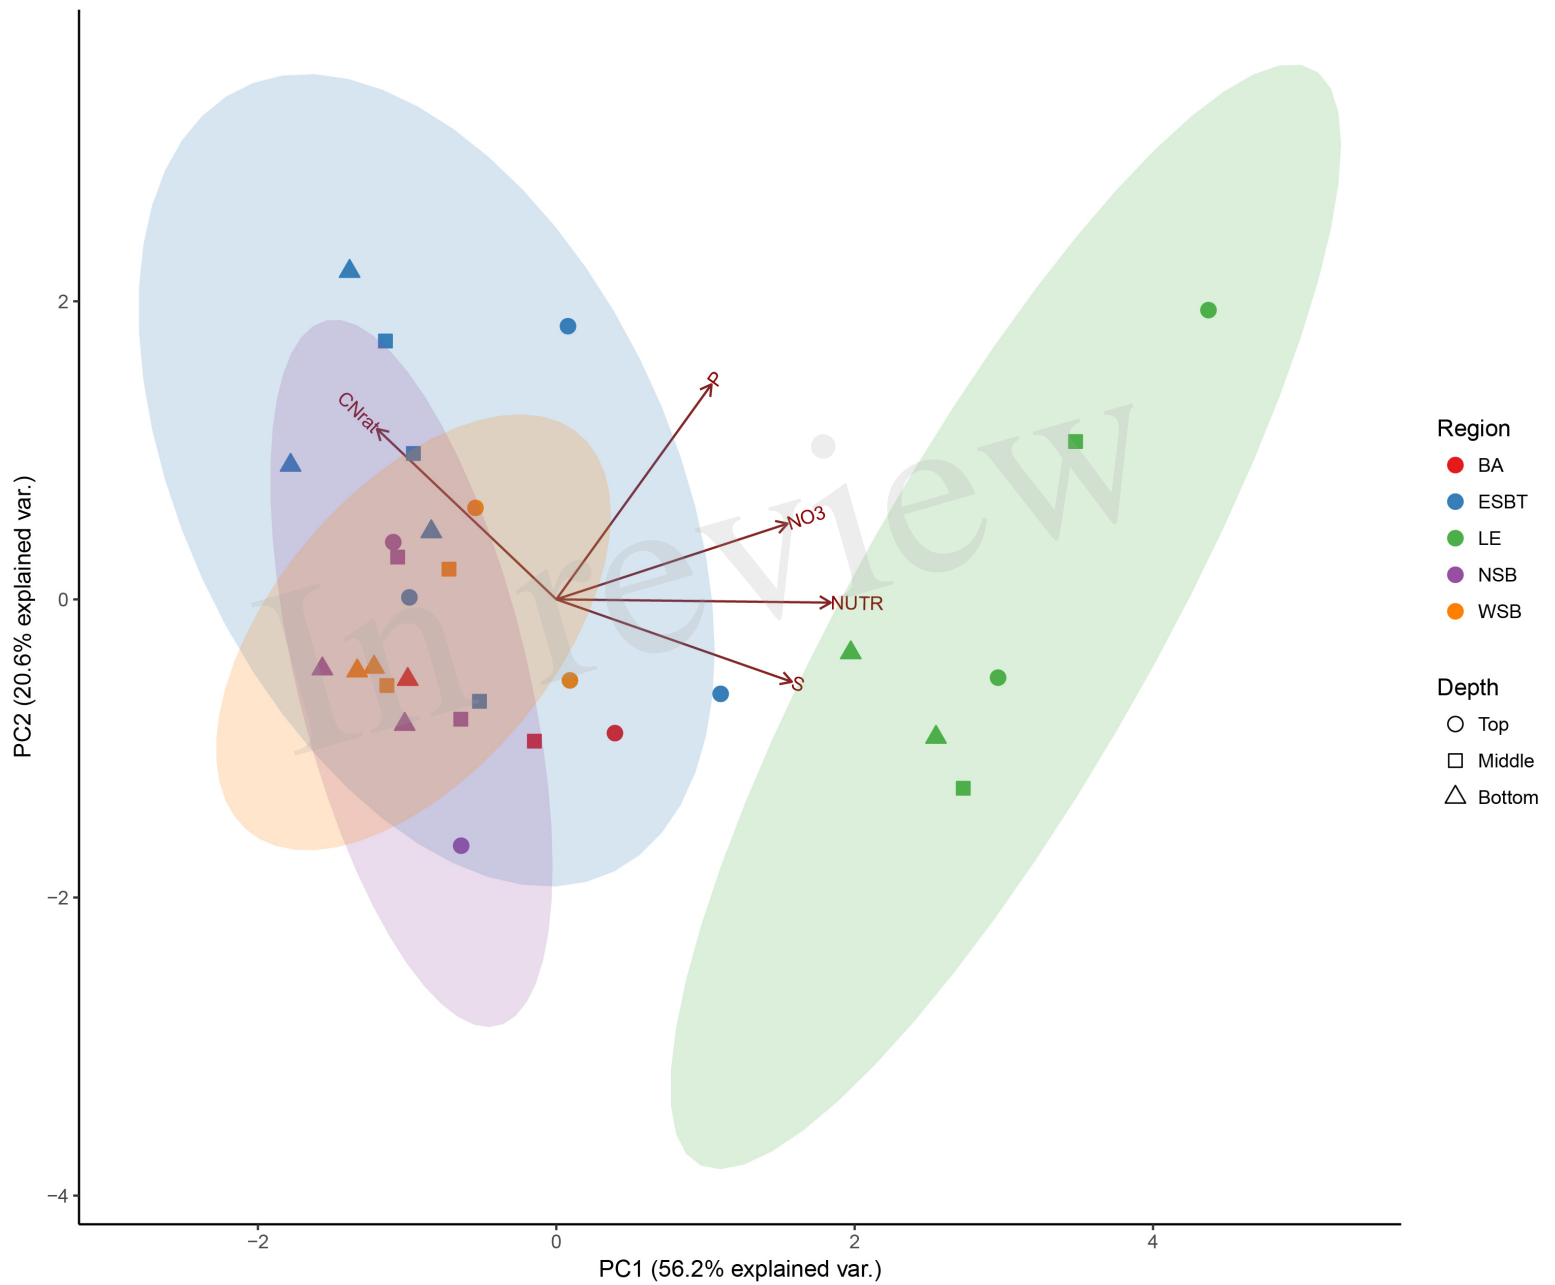

Figure 3.JPEG

bioRxiv preprint doi: <https://doi.org/10.1101/217919>; this version posted April 17, 2018. The copyright holder for this preprint (which was not certified by peer review) is the author/funder, who has granted bioRxiv a license to display the preprint in perpetuity. It is made available under aCC-BY-NC-ND 4.0 International license.

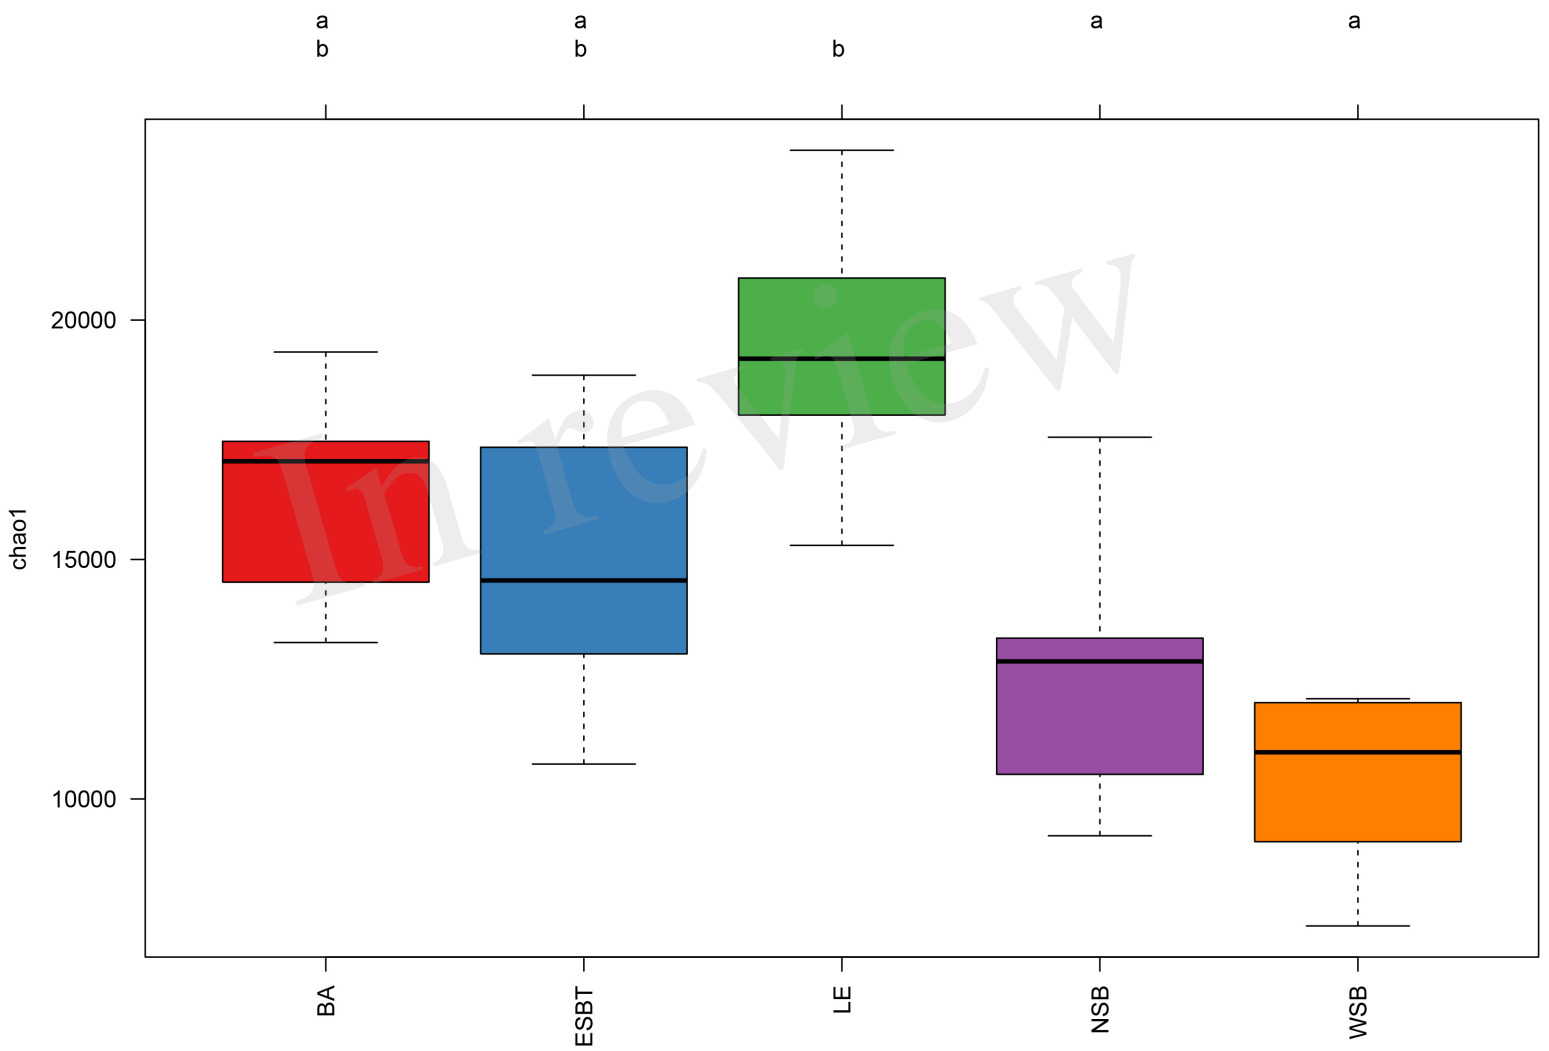

Figure 4.JPEG

bioRxiv preprint doi: <https://doi.org/10.1101/217919>; this version posted April 17, 2018. The copyright holder for this preprint (which was not certified by peer review) is the author/funder, who has granted bioRxiv a license to display the preprint in perpetuity. It is made available under aCC-BY-NC-ND 4.0 International license.

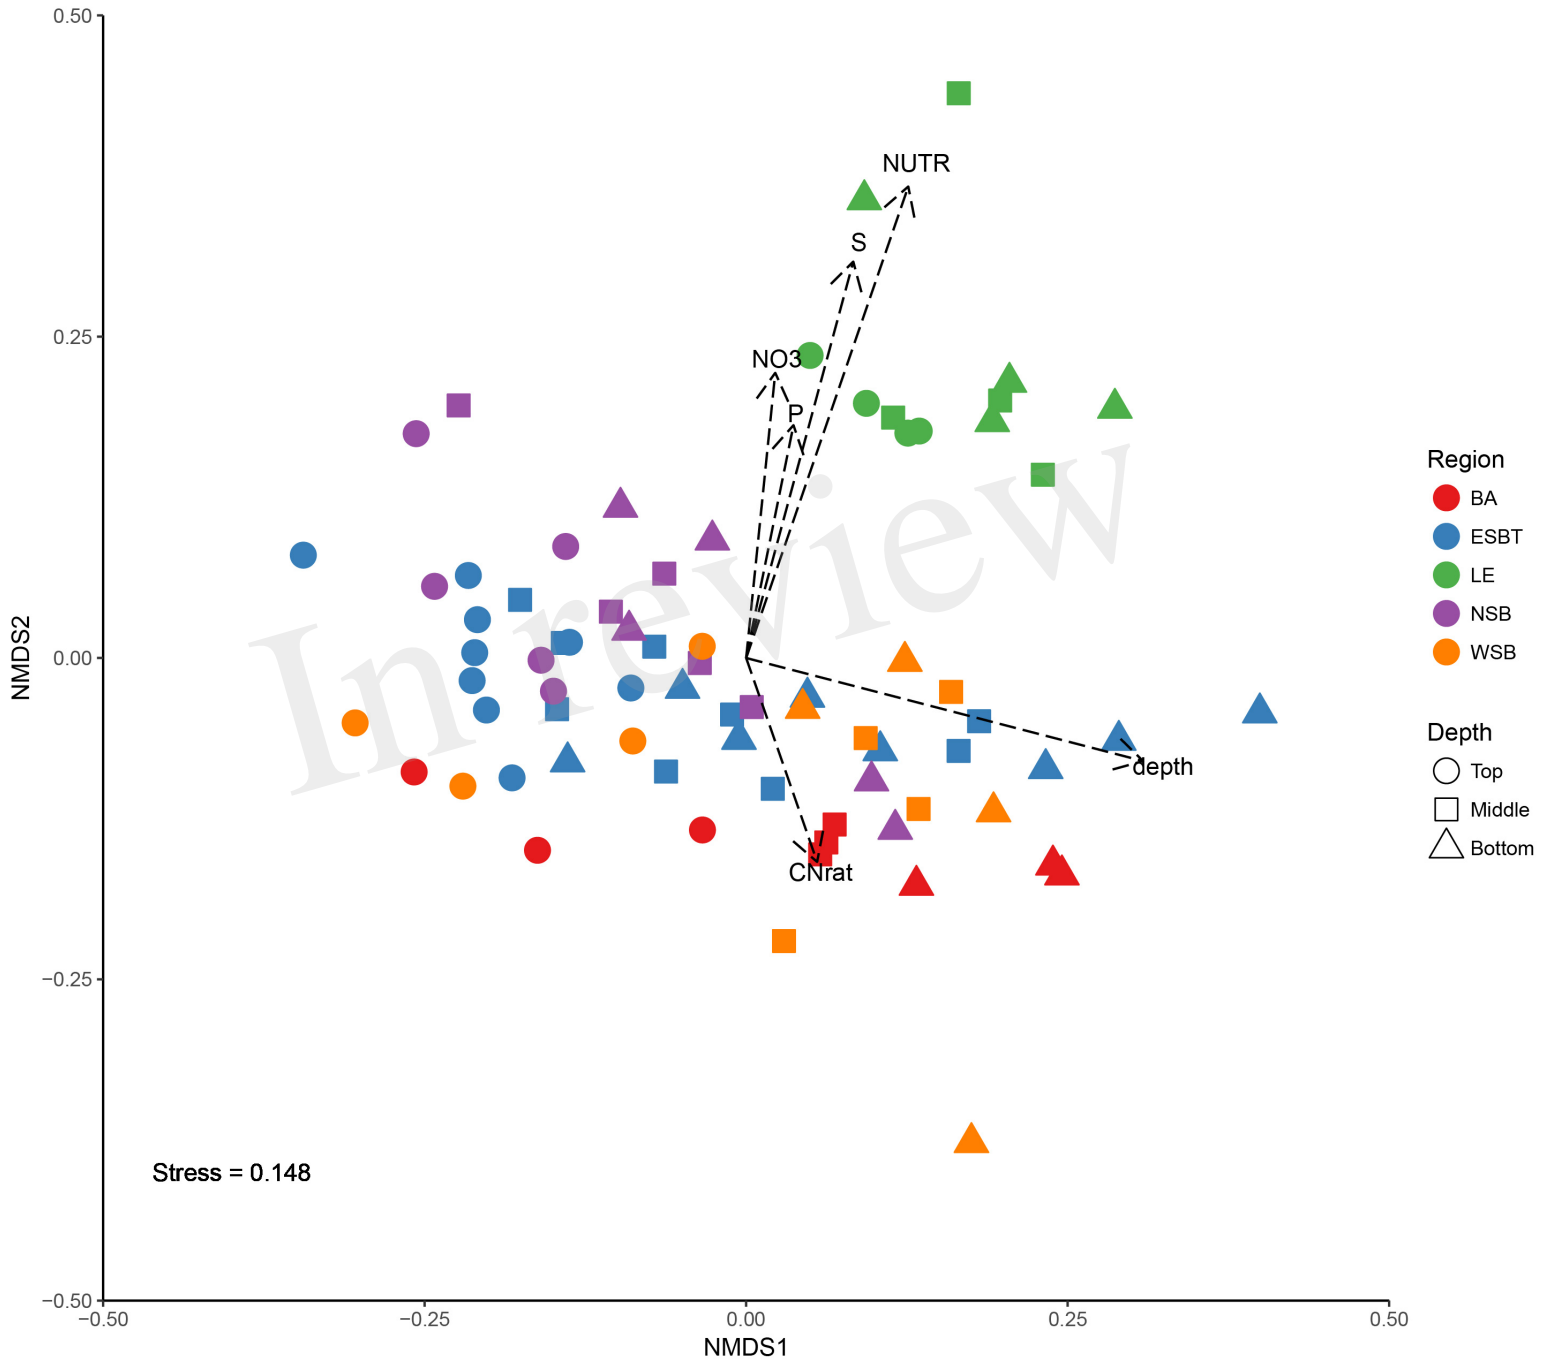

Figure 5.JPEG

bioRxiv preprint doi: <https://doi.org/10.1101/217919>; this version posted April 17, 2018. The copyright holder for this preprint (which was not certified by peer review) is the author/funder, who has granted bioRxiv a license to display the preprint in perpetuity. It is made available under aCC-BY-NC-ND 4.0 International license.

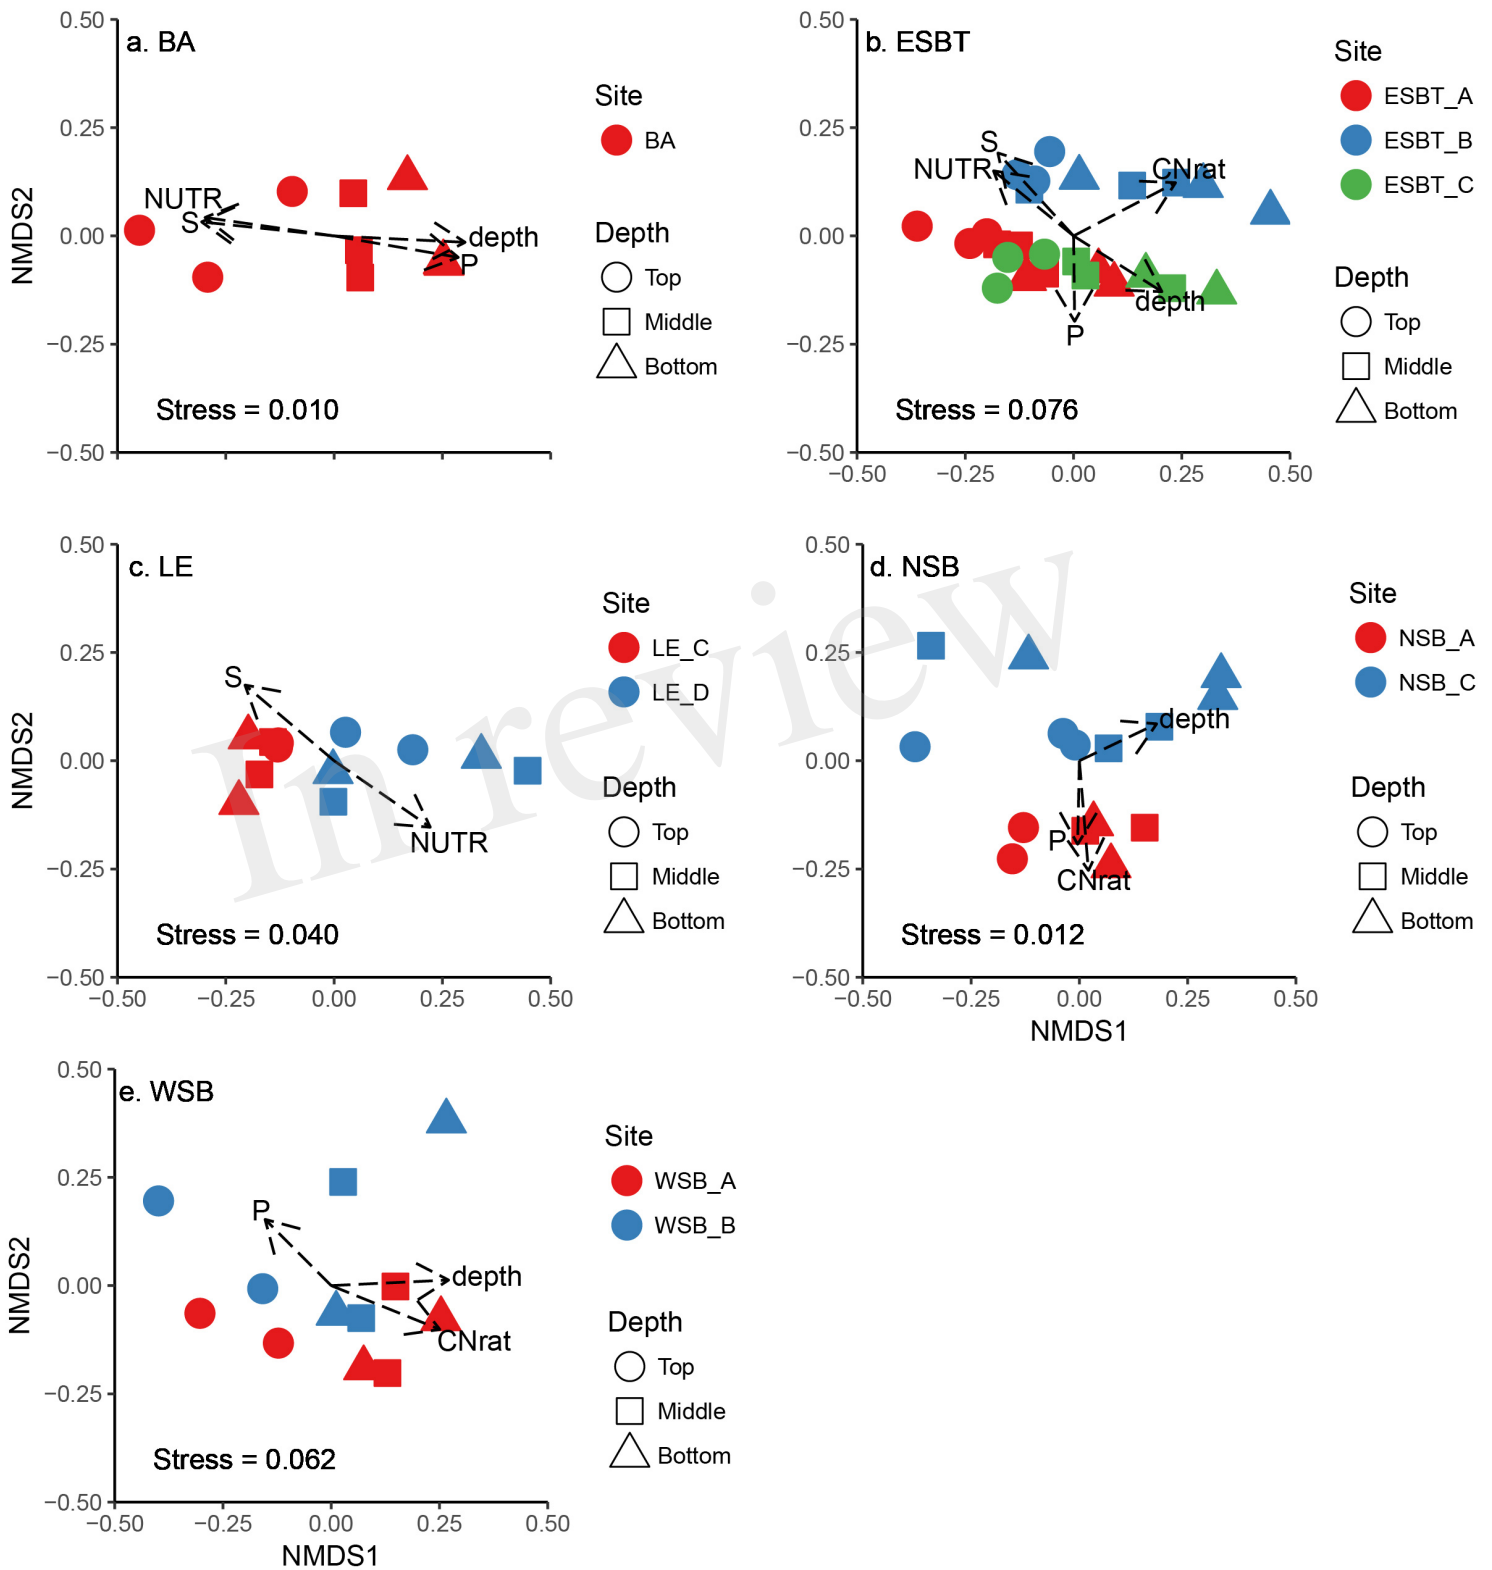

Figure 6.JPEG

bioRxiv preprint doi: <https://doi.org/10.1101/217919>; this version posted April 17, 2018. The copyright holder for this preprint (which was not certified by peer review) is the author/funder, who has granted bioRxiv a license to display the preprint in perpetuity. It is made available under aCC-BY-NC-ND 4.0 International license.

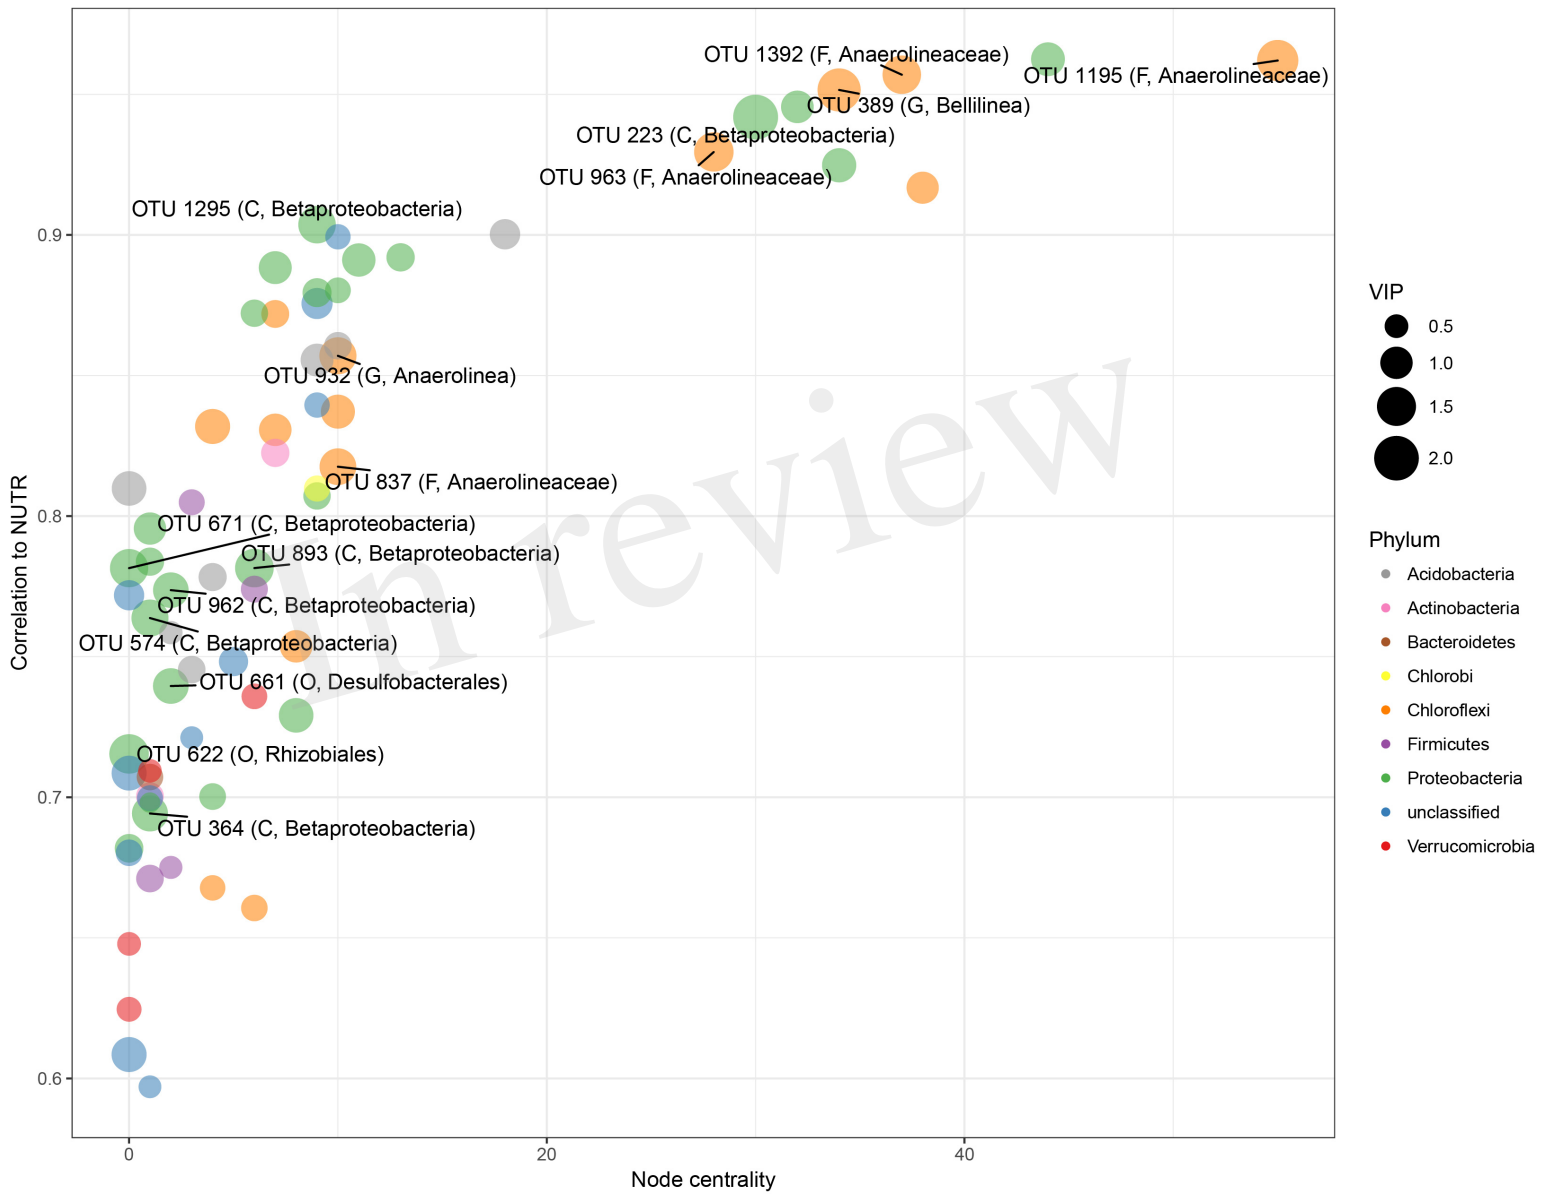

Figure 7.JPEG

bioRxiv preprint doi: <https://doi.org/10.1101/217919>; this version posted April 17, 2018. The copyright holder for this preprint (which was not certified by peer review) is the author/funder, who has granted bioRxiv a license to display the preprint in perpetuity. It is made available under aCC-BY-NC-ND 4.0 International license.

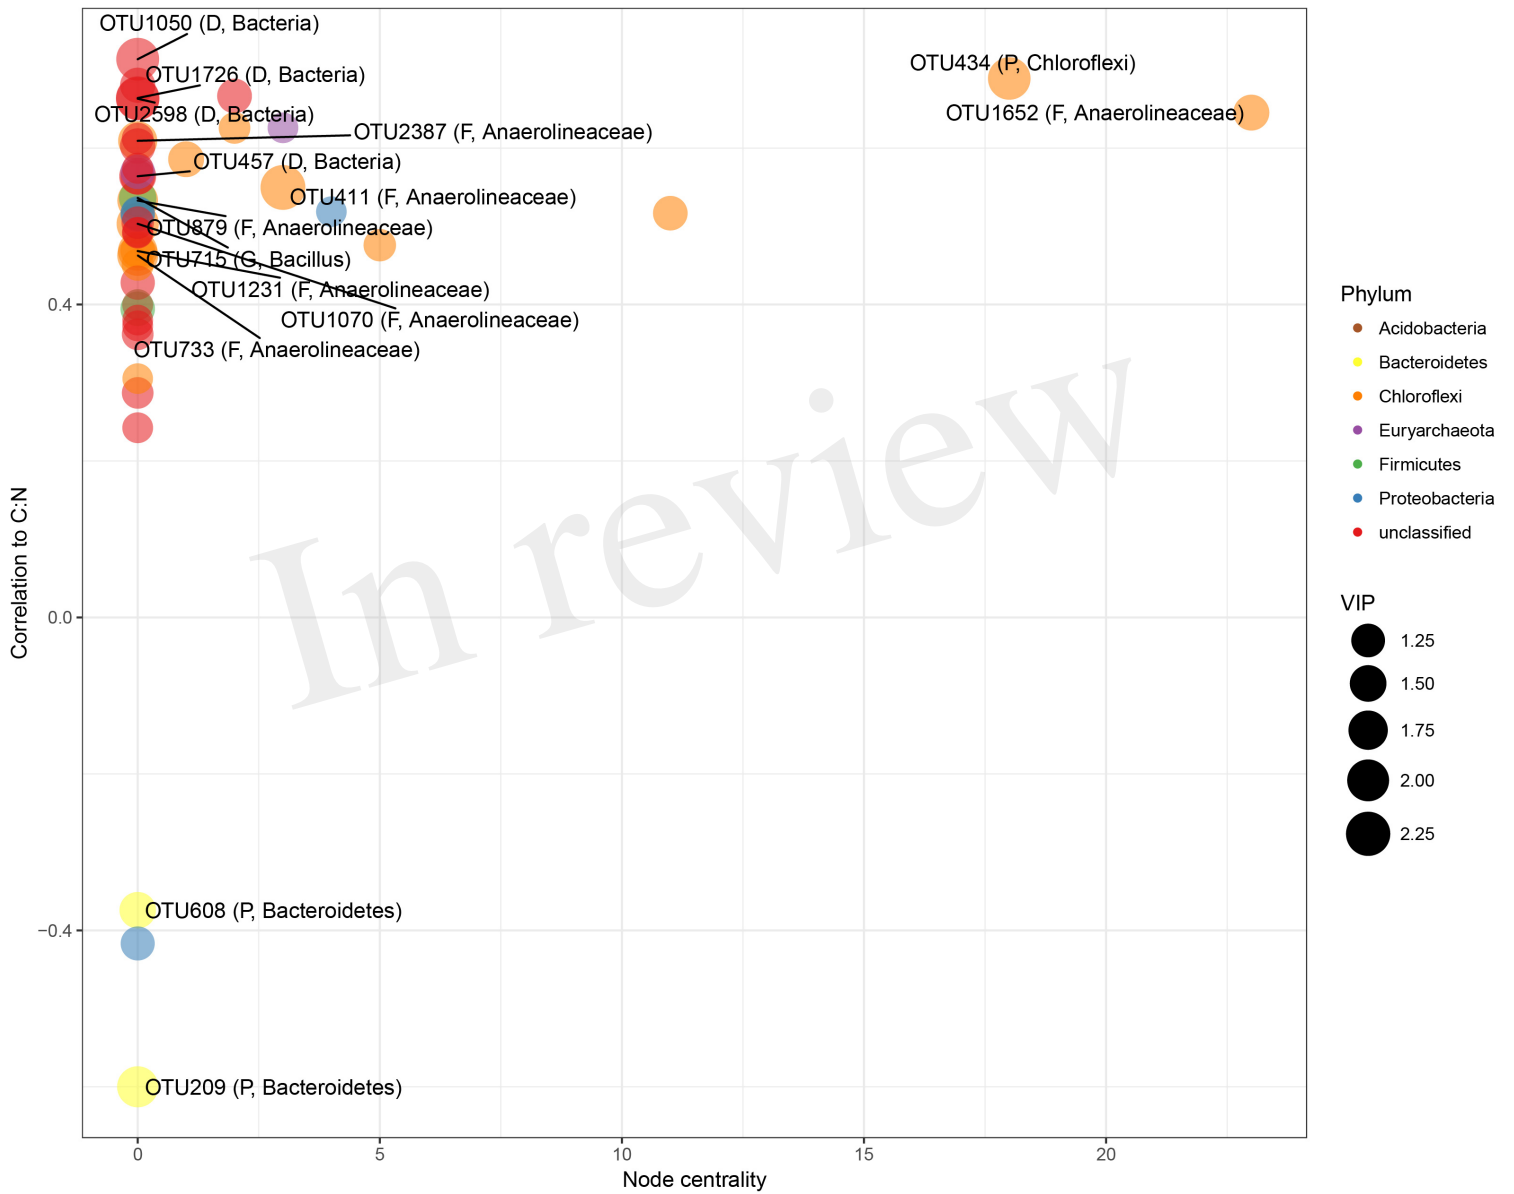

Source: https://www.biorxiv.org/content/10.1101/217919v2.full.pdf
